# Supplementary material for: Effectiveness of a peer-mediated educational intervention in improving general practitioner diagnostic assessment and management of dementia: a cluster randomised controlled trial
Source: PubMed Central journal article supplement — BMJ Open. 2018 Aug 17;8(8):e021125. doi: 10.1136/bmjopen-2017-021125 (PMC6104761; doi:10.1136/bmjopen-2017-021125), 2018-08-17
Supplement: bmjopen-2017-021125.draft_revisions.pdf [file bmjopen-2017-021125.draft_revisions.pdf]

# BMJ Open

BMJ Open is committed to open peer review. As part of this commitment we make the peer review history of every article we publish publicly available.

When an article is published we post the peer reviewers' comments and the authors' responses online. We also post the versions of the paper that were used during peer review. These are the versions that the peer review comments apply to.

The versions of the paper that follow are the versions that were submitted during the peer review process. They are not the versions of record or the final published versions. They should not be cited or distributed as the published version of this manuscript.

BMJ Open is an open access journal and the full, final, typeset and author-corrected version of record of the manuscript is available on our site with no access controls, subscription charges or pay-per-view fees (<http://bmjopen.bmj.com>).

If you have any questions on BMJ Open's open peer review process please email [info.bmjopen@bmj.com](mailto:info.bmjopen@bmj.com)

# BMJ Open

## Effectiveness of a peer mediated educational intervention in improving general practitioner diagnostic assessment and management of dementia: a cluster randomised controlled trial

|                               |                                                                                                                                                                                                                                                                                                                                                                                                                                                                                                                                                                                                                                                                                                                                                                                                                                                                                                                                                                                                                                                                                                                                                    |
|-------------------------------|----------------------------------------------------------------------------------------------------------------------------------------------------------------------------------------------------------------------------------------------------------------------------------------------------------------------------------------------------------------------------------------------------------------------------------------------------------------------------------------------------------------------------------------------------------------------------------------------------------------------------------------------------------------------------------------------------------------------------------------------------------------------------------------------------------------------------------------------------------------------------------------------------------------------------------------------------------------------------------------------------------------------------------------------------------------------------------------------------------------------------------------------------|
| Journal:                      | <i>BMJ Open</i>                                                                                                                                                                                                                                                                                                                                                                                                                                                                                                                                                                                                                                                                                                                                                                                                                                                                                                                                                                                                                                                                                                                                    |
| Manuscript ID                 | bmjopen-2017-021125                                                                                                                                                                                                                                                                                                                                                                                                                                                                                                                                                                                                                                                                                                                                                                                                                                                                                                                                                                                                                                                                                                                                |
| Article Type:                 | Research                                                                                                                                                                                                                                                                                                                                                                                                                                                                                                                                                                                                                                                                                                                                                                                                                                                                                                                                                                                                                                                                                                                                           |
| Date Submitted by the Author: | 04-Jan-2018                                                                                                                                                                                                                                                                                                                                                                                                                                                                                                                                                                                                                                                                                                                                                                                                                                                                                                                                                                                                                                                                                                                                        |
| Complete List of Authors:     | <p>Pond, Dimity; University of Newcastle, School of Medicine and Public Health<br/> Mate, Karen; University of Newcastle, School of Biomedical Sciences and Pharmacy<br/> Stocks, Nigel; University of Adelaide, Discipline of General Practice, School of Population Health<br/> Gunn, Jane; University of Melbourne, Department of General Practice<br/> Disler, Peter; Monash University, School of Rural Health; The University of Melbourne, Department of Rural Health<br/> Magin, Parker; University of Newcastle, School of Medicine and Public Health<br/> Marley, John; University of Newcastle, School of Medicine and Public Health<br/> Paterson, Nerida; University of Newcastle, School of Medicine and Public Health<br/> Horton, Graeme; University of Newcastle, School of Medicine and Public Health<br/> Goode, Susan; University of Newcastle, School of Medicine and Public Health<br/> Weaver, Natasha; University of Newcastle, School of Medicine and Public Health<br/> Brodaty, Henry; University of New South Wales, Dementia Collaborative Research Centre, Centre for Healthy Brain Ageing, School of Psychiatry</p> |
| Keywords:                     | GERIATRIC MEDICINE, MEDICAL EDUCATION & TRAINING, Dementia < NEUROLOGY, PRIMARY CARE                                                                                                                                                                                                                                                                                                                                                                                                                                                                                                                                                                                                                                                                                                                                                                                                                                                                                                                                                                                                                                                               |
|                               |                                                                                                                                                                                                                                                                                                                                                                                                                                                                                                                                                                                                                                                                                                                                                                                                                                                                                                                                                                                                                                                                                                                                                    |

SCHOLARONE™  
Manuscripts

1  
2  
3 *Prepared for BMJ Open*  
4  
5  
6  
7

8  
9 **Effectiveness of a peer mediated educational intervention in improving general**  
10 **practitioner diagnostic assessment and management of dementia: a cluster**  
11 **randomised controlled trial**  
12  
13

14  
15  
16  
17 Dimity Pond<sup>1</sup>, Karen Mate<sup>2</sup>, Nigel Stocks<sup>3</sup>, Jane Gunn<sup>4</sup>, Peter Disler<sup>5</sup>, Parker Magin<sup>1</sup>, John  
18 Marley<sup>1</sup>, Nerida Paterson<sup>1</sup>, Graeme Horton<sup>1</sup>, Susan Goode<sup>1</sup>, Natasha Weaver<sup>1</sup>, Henry  
19 Brodaty<sup>6</sup>  
20

21  
22 <sup>1</sup> School of Medicine & Public Health, University of Newcastle, NSW, Australia; <sup>2</sup> School of Biomedical Sciences  
23 and Pharmacy, University of Newcastle, NSW, Australia; <sup>3</sup>Discipline of General Practice, School of Population  
24 Health, The University of Adelaide, SA, Australia; <sup>4</sup> Department of General Practice, The University of Melbourne,  
25 Victoria, Australia; <sup>5</sup>School of Rural Health, Monash University, Bendigo, Victoria, Australia; <sup>6</sup>Dementia  
26 Collaborative Research Centre, Centre for Healthy Brain Ageing, School of Psychiatry, University of New South  
27 Wales, NSW, Australia  
28  
29  
30  
31  
32  
33  
34  
35  
36  
37  
38  
39  
40  
41  
42  
43  
44  
45  
46  
47  
48

49 Correspondence should be addressed to:  
50 Dimity Pond  
51 School of Medicine and Public Health  
52 University of Newcastle, Callaghan, NSW, Australia, 2308  
53 Phone: +61 2 49686720; Fax: +61 2 49686727  
54 Email: Dimity.Pond@newcastle.edu.au  
55  
56  
57  
58  
59  
60

## ABSTRACT

**Objective** To test the effectiveness of an educational intervention for general practitioners in improving detection and management of dementia, and quality of life outcomes for patients and carers.

**Design** Double blind, cluster randomised controlled trial.

**Setting** General practices in Australia between 2007 and 2010.

**Participants** General practices were randomly allocated to the waitlist (n=37) or intervention (n=66) group, in a ratio of 1:2. A total of 2,030 (1478 intervention; 552 waitlist) community dwelling participants aged 75 years or older were recruited via 168 GPs (113 intervention; 55 waitlist).

**Interventions** A practice-based medical detailing intervention led by a peer medical or nurse educator that included (i) training in use of the General Practitioner assessment of Cognition (GPCOG) dementia screening instrument, (ii) training in diagnosis and management based on Royal Australian College of General Practitioners (RACGP) Dementia Guidelines, using a case based approach (iii) identifying and addressing general practitioners' (GPs') perceived barriers to dementia diagnosis, and (iv) a business case outlining a cost effective dementia assessment approach for the practice.

**Main Outcome Measures** Compared with a baseline pre-intervention audit (i) Sensitivity and specificity of GP identification of dementia, (ii) referral to appropriate services and/or medical specialists for memory problems (iii) patient and carer quality of life, depression and satisfaction with care (specifically communication and enablement).

**Results** At one year, the educational intervention had improved the sensitivity of GP judgment of dementia ( $p=0.002$ ; odds ratio 6.0, 95% CI: 1.92-18.73), satisfaction with GP communication for all patients ( $p=0.024$ ; odds ratio 2.1, 95% CI: 0.27-3.93) and for patients with CAMCOG-R dementia ( $p=0.007$ ; odds ratio 7.44, 95% CI: 2.02-12.86) and enablement of carers ( $p=0.0185$ ; odds ratio 24.77, 95% CI: 4.15-45.40). The intervention had no significant effect on diagnostic specificity, management of dementia, or patient and carer quality of life.

**Conclusion** Practice based medical detailing improved detection of dementia in primary care, patient satisfaction with GP communication and enablement of carers.

**Trial Registration** ACTRN12607000117415

## Strength and Limitations

- Individual and contemporaneous home assessments were completed for each participant, rather than relying on administrative data such as GP records.
- The educational intervention was specifically designed to address a number of identified barriers to GP identification and management of dementia and was also personalised to each GP.
- Evaluation measures included not only detection and management of dementia, but also patient and carer outcomes, thus capturing the last (and essential) translational output from the intervention.
- Findings relating to carers must be interpreted with caution due their relatively high (and differential) loss to follow-up.
- GP learning was not directly measured, and the adherence to dementia guidelines was assessed by self-reporting of dementia related tests and referrals by GPs.

## INTRODUCTION

Dementia is a complex and variable condition which affects cognition, behaviour and the person's ability to perform everyday tasks. The number of people living with dementia worldwide is currently estimated at 46.8 million. This number is expected to double by 2030 and almost triple by 2050, due to the increasing longevity of the world population [1].

Timely diagnosis and management of dementia is desired by many patients with dementia and their carers [2-4], to improve their access to interventions and support at the most appropriate time [5]. Diagnostic disclosure of memory problems is associated with better physical and environmental quality of life (QoL) in people with dementia [6], and is not associated with poorer health-related QoL [7]. A timely diagnosis may help people with dementia, and their carers, understand and cope with the challenging symptoms of dementia, fulfil short-term goals and facilitate planning for the future while they are still competent to do so [8, 9]. Referral can be made for social support services and specialist treatments, including anti-dementia medications that may slow the course of cognitive decline. Studies have shown that general practitioners fail to identify about 50% of mild dementia cases in the community [10-12] and demonstrate gaps in recorded diagnostic processes against guidelines[13].

There are a number of barriers to diagnosis of dementia that can be attributed to the patient or carer, the general practitioner (GP) or systemic factors [14, 15]. The gradual decline in functional ability in the early stages of dementia can be attributed to 'normal' aging, not only by the person with the condition or those close to them, but also by their GP [16-18]. The stigma associated with dementia may delay help seeking [19]. Only one in five people who mention memory problems to their GP have dementia [12], so the GP may choose to observe such a patient, rather than proceeding early to an expensive and alarming diagnostic assessment. Other GP-related barriers to early diagnosis include lack of knowledge [9] and/or confidence [16, 17, 20-23], the reality that dementia diagnosis is difficult due to slow and fluctuating onset and overlap of symptoms with other diseases, lack of a definitive diagnostic test[22], and the

1  
2  
3 perception of dementia diagnosis as a specialist domain [24]. No medication exists which will  
4 effectively reverse or halt the progress of these disorders, and GPs may not conceptualise social  
5 and system support for ongoing cognitive decline as therapeutic; nihilism may also hinder  
6 diagnosis and management [25].  
7  
8  
9

10  
11 An intervention aimed at overcoming patient barriers to dementia diagnosis resulted in more  
12 patients presenting to their GP with memory problems, but no increase in diagnoses [26].  
13

14  
15 GPs' detection and management of dementia have been addressed in several educational  
16 interventions with varying success [15, 27-31]. Large seminar-based interventions have limited  
17 effectiveness [25], however educational interventions that incorporated active small-group  
18 learning tasks, resulted in improved detection of dementia [30, 31]. The most effective  
19 educational strategies appear to be those delivered in the context of a coordinated dementia  
20 case management setting[28], and designed to target the specifically determined barriers for  
21 individual practitioners [15, 32].  
22  
23  
24  
25  
26  
27  
28  
29

30  
31 The objective of this study was to determine the effectiveness of an educational intervention  
32 that included a peer outreach detailing visit to each practice, using model cases to illustrate case  
33 identification and management, and designed to address individual GP needs. The barriers to GP  
34 diagnosis and management of dementia addressed were: the limited time available for  
35 consultation, lack of relevant knowledge and attitudinal factors. Further discussion with the GP  
36 elicited and addressed any additional barriers. Primary outcomes were patient focussed (QoL  
37 and depression scores); secondary outcome measures included GP and carer factors.  
38  
39  
40  
41  
42  
43  
44  
45  
46  
47  
48  
49  
50  
51  
52  
53  
54  
55  
56  
57  
58  
59  
60

## METHODS

### *Study Design*

This study (the AGP trial) was a cluster randomised trial with a 12 month follow-up. A parallel design was employed. Practices with participating general practitioners (GPs) were randomly allocated in a ratio of 2:1 to either an intervention or waitlist group. Intervention practices (n=66) received a dementia related educational peer outreach visit, and completed two patient audits with feedback. Waitlist practices (n=37) completed two audits without feedback and were mailed the then-current Royal Australian College of General Practitioners (RACGP) Dementia Guidelines at 12 months [33]. The rationale and study design have been reported in detail previously [34].

### *Participants*

Practices eligible for inclusion in the study were located within 30km of each urban study site headquarters (Sydney, Newcastle, Melbourne, Adelaide) or from the rural study site of Bendigo or its surrounding towns; had community dwelling patients aged  $\geq 75$  years; and used a computerised patient database. GPs that had been involved in development of the project were excluded. The cluster randomisation has been described elsewhere [34]. Briefly, a list of all eligible practices was compiled and sent to an independent party, the Centre for Epidemiology and Biostatistics at the University of Newcastle (CCEB), for randomisation. CCEB provided the approach order for the practices; a project nurse or GP visited each practice to explain the project and recruit GPs prior to allocation of the practice to intervention or waitlist. Practices were stratified by site, and by size of practice as either standard or large (>7 GPs working in the practice), and then allocated to intervention or waitlist in a ratio of 2:1 in randomly rotated blocks of 3 and 6. Of the 2,800 GPs approached, 168 (6%) entered the study. This sample was representative based on comparison with demographics of all active recognised GPs in Australia [35].



1  
2  
3 GPs sent letters of invitation to all patients who met the inclusion criteria, inviting them to  
4 participate in the study. Those who agreed to participate responded by returning a consent form  
5 to the local study site. Patients eligible for inclusion in the study were aged  $\geq 75$  years, had  
6 visited their GP within the last 24 months, and were able to speak and understand English. The  
7 exclusion criteria were Parkinson's disease, multiple sclerosis, motor neuron disease, central  
8 nervous system inflammation, psychotic symptoms prior to recruitment, developmental  
9 disability, progressive malignancy or substance abuse, too sick to complete the study, or  
10 resident of aged care facility at entry to the study.  
11  
12  
13  
14  
15  
16  
17  
18

19 Carers of patients were eligible for the study if they had been identified as a carer or support  
20 person by a patient scoring  $<80$  on the revised Cambridge Cognitive Examination (CAMCOG-R)  
21 [36], had prior consent from the patient with dementia for his/her carer to participate and were  
22 able to speak and understand English.  
23  
24  
25  
26  
27

### 28 *Intervention*

29  
30 The intervention in this study consisted of an educational session conducted at each GP's  
31 surgery by a trained peer medical or nurse educator. The session was conducted after  
32 completion of the baseline audit of patients by the GP, and included (i) instruction in the use of  
33 the General Practitioner assessment of Cognition (GPCOG) dementia screening instrument [37],  
34 (ii) an interactive presentation on dementia diagnosis, diagnostic workup and management  
35 based on the RACGP Dementia Guidelines[33], (iii) an exploration of the GP's perceived barriers  
36 to dementia diagnosis, and (iv) a business case outlining the cost recovery potential of dementia  
37 assessment in terms of the Australian government's Medicare Benefits Schedule. The systemic  
38 issue of lack of time in the GP consultation was addressed by training the GPs in the use of a brief  
39 screening instrument and by discussing potential methods of obtaining assistance from the  
40 practice nurse. Case studies were used to illustrate appropriate management. A second audit  
41 was held at 12 months, after which results of the nurse assessment were fed back to the GPs.  
42  
43  
44  
45  
46  
47  
48  
49  
50  
51  
52  
53  
54  
55  
56  
57  
58  
59  
60  
61  
62  
63  
64  
65  
66  
67  
68  
69  
70  
71  
72  
73  
74  
75  
76  
77  
78  
79  
80  
81  
82  
83  
84  
85  
86  
87  
88  
89  
90  
91  
92  
93  
94  
95  
96  
97  
98  
99  
100  
101  
102  
103  
104  
105  
106  
107  
108  
109  
110  
111  
112  
113  
114  
115  
116  
117  
118  
119  
120  
121  
122  
123  
124  
125  
126  
127  
128  
129  
130  
131  
132  
133  
134  
135  
136  
137  
138  
139  
140  
141  
142  
143  
144  
145  
146  
147  
148  
149  
150  
151  
152  
153  
154  
155  
156  
157  
158  
159  
160  
161  
162  
163  
164  
165  
166  
167  
168  
169  
170  
171  
172  
173  
174  
175  
176  
177  
178  
179  
180  
181  
182  
183  
184  
185  
186  
187  
188  
189  
190  
191  
192  
193  
194  
195  
196  
197  
198  
199  
200  
201  
202  
203  
204  
205  
206  
207  
208  
209  
210  
211  
212  
213  
214  
215  
216  
217  
218  
219  
220  
221  
222  
223  
224  
225  
226  
227  
228  
229  
230  
231  
232  
233  
234  
235  
236  
237  
238  
239  
240  
241  
242  
243  
244  
245  
246  
247  
248  
249  
250  
251  
252  
253  
254  
255  
256  
257  
258  
259  
260  
261  
262  
263  
264  
265  
266  
267  
268  
269  
270  
271  
272  
273  
274  
275  
276  
277  
278  
279  
280  
281  
282  
283  
284  
285  
286  
287  
288  
289  
290  
291  
292  
293  
294  
295  
296  
297  
298  
299  
300  
301  
302  
303  
304  
305  
306  
307  
308  
309  
310  
311  
312  
313  
314  
315  
316  
317  
318  
319  
320  
321  
322  
323  
324  
325  
326  
327  
328  
329  
330  
331  
332  
333  
334  
335  
336  
337  
338  
339  
340  
341  
342  
343  
344  
345  
346  
347  
348  
349  
350  
351  
352  
353  
354  
355  
356  
357  
358  
359  
360  
361  
362  
363  
364  
365  
366  
367  
368  
369  
370  
371  
372  
373  
374  
375  
376  
377  
378  
379  
380  
381  
382  
383  
384  
385  
386  
387  
388  
389  
390  
391  
392  
393  
394  
395  
396  
397  
398  
399  
400  
401  
402  
403  
404  
405  
406  
407  
408  
409  
410  
411  
412  
413  
414  
415  
416  
417  
418  
419  
420  
421  
422  
423  
424  
425  
426  
427  
428  
429  
430  
431  
432  
433  
434  
435  
436  
437  
438  
439  
440  
441  
442  
443  
444  
445  
446  
447  
448  
449  
450  
451  
452  
453  
454  
455  
456  
457  
458  
459  
460  
461  
462  
463  
464  
465  
466  
467  
468  
469  
470  
471  
472  
473  
474  
475  
476  
477  
478  
479  
480  
481  
482  
483  
484  
485  
486  
487  
488  
489  
490  
491  
492  
493  
494  
495  
496  
497  
498  
499  
500  
501  
502  
503  
504  
505  
506  
507  
508  
509  
510  
511  
512  
513  
514  
515  
516  
517  
518  
519  
520  
521  
522  
523  
524  
525  
526  
527  
528  
529  
530  
531  
532  
533  
534  
535  
536  
537  
538  
539  
540  
541  
542  
543  
544  
545  
546  
547  
548  
549  
550  
551  
552  
553  
554  
555  
556  
557  
558  
559  
560  
561  
562  
563  
564  
565  
566  
567  
568  
569  
570  
571  
572  
573  
574  
575  
576  
577  
578  
579  
580  
581  
582  
583  
584  
585  
586  
587  
588  
589  
590  
591  
592  
593  
594  
595  
596  
597  
598  
599  
600  
601  
602  
603  
604  
605  
606  
607  
608  
609  
610  
611  
612  
613  
614  
615  
616  
617  
618  
619  
620  
621  
622  
623  
624  
625  
626  
627  
628  
629  
630  
631  
632  
633  
634  
635  
636  
637  
638  
639  
640  
641  
642  
643  
644  
645  
646  
647  
648  
649  
650  
651  
652  
653  
654  
655  
656  
657  
658  
659  
660  
661  
662  
663  
664  
665  
666  
667  
668  
669  
670  
671  
672  
673  
674  
675  
676  
677  
678  
679  
680  
681  
682  
683  
684  
685  
686  
687  
688  
689  
690  
691  
692  
693  
694  
695  
696  
697  
698  
699  
700  
701  
702  
703  
704  
705  
706  
707  
708  
709  
710  
711  
712  
713  
714  
715  
716  
717  
718  
719  
720  
721  
722  
723  
724  
725  
726  
727  
728  
729  
730  
731  
732  
733  
734  
735  
736  
737  
738  
739  
740  
741  
742  
743  
744  
745  
746  
747  
748  
749  
750  
751  
752  
753  
754  
755  
756  
757  
758  
759  
760  
761  
762  
763  
764  
765  
766  
767  
768  
769  
770  
771  
772  
773  
774  
775  
776  
777  
778  
779  
780  
781  
782  
783  
784  
785  
786  
787  
788  
789  
790  
791  
792  
793  
794  
795  
796  
797  
798  
799  
800  
801  
802  
803  
804  
805  
806  
807  
808  
809  
810  
811  
812  
813  
814  
815  
816  
817  
818  
819  
820  
821  
822  
823  
824  
825  
826  
827  
828  
829  
830  
831  
832  
833  
834  
835  
836  
837  
838  
839  
840  
841  
842  
843  
844  
845  
846  
847  
848  
849  
850  
851  
852  
853  
854  
855  
856  
857  
858  
859  
860  
861  
862  
863  
864  
865  
866  
867  
868  
869  
870  
871  
872  
873  
874  
875  
876  
877  
878  
879  
880  
881  
882  
883  
884  
885  
886  
887  
888  
889  
890  
891  
892  
893  
894  
895  
896  
897  
898  
899  
900  
901  
902  
903  
904  
905  
906  
907  
908  
909  
910  
911  
912  
913  
914  
915  
916  
917  
918  
919  
920  
921  
922  
923  
924  
925  
926  
927  
928  
929  
930  
931  
932  
933  
934  
935  
936  
937  
938  
939  
940  
941  
942  
943  
944  
945  
946  
947  
948  
949  
950  
951  
952  
953  
954  
955  
956  
957  
958  
959  
960  
961  
962  
963  
964  
965  
966  
967  
968  
969  
970  
971  
972  
973  
974  
975  
976  
977  
978  
979  
980  
981  
982  
983  
984  
985  
986  
987  
988  
989  
990  
991  
992  
993  
994  
995  
996  
997  
998  
999  
1000

1  
2  
3 mailed a written summary of their patient's home assessment and the RACGP Dementia  
4  
5 Guidelines after completion of the 12 month audit.  
6  
7

### 8 9 *Data Collection*

10 At baseline, waitlist and intervention GPs received a list of their participating patients to audit.  
11  
12 This audit task required GPs to provide their clinical judgement in relation to each patient's  
13  
14 dementia status using one of four options: No Dementia, Possible Dementia, Probable Dementia,  
15  
16 Definite Dementia. GPs completed a supplementary audit for any patients with possible,  
17  
18 probable or definite dementia to gather data on memory related tests and investigations  
19  
20 performed (i.e. paper and pencil test for cognition or depression; pathology; radiology) and  
21  
22 referrals to services and specialists. Differential diagnosis and identification of reversible causes  
23  
24 were also requested. This audit was repeated at 12 months. Although GPs were aware that there  
25  
26 were intervention and waitlist groups, they were not aware of the nature of the intervention,  
27  
28 and indeed both groups participated in the audit. We therefore consider that GPs were blinded  
29  
30 to the group allocation for the entirety of the study.  
31  
32

33  
34 Patient and carer assessments were conducted at their home by a research nurse at baseline and  
35  
36 12 months. Information was collected from patients and carers relating to their personal and  
37  
38 social circumstances including socioeconomic status using the Index of Relative Social  
39  
40 Advantage and Disadvantage (IRSAD) [38], quality of life, depression and satisfaction with GP  
41  
42 care. The cognitive function of patients was assessed using the GPCOG and CAMCOG-R. All  
43  
44 nurses were trained in administration of each instrument and adhered to a standardised  
45  
46 interview protocol to minimise interviewer bias. The specific patient characteristics collected  
47  
48 and the instruments and criteria used have been described previously [6, 12]. If requested by the  
49  
50 GP, the nurse also conducted a "75+ Health Assessment", an item that can be rebated under the  
51  
52 Australian Medicare system. These data were not used by the study, but were returned to the GP  
53  
54 for his or her use. Research nurses and patients were blinded to the group allocation for the  
55  
56 entire study.  
57  
58  
59  
60

1  
2  
3 At the completion of the baseline assessment, each patient received a letter prepared by the  
4 project manager, directing them to obtain an appointment with his/her GP. Patients in the  
5 waitlist group, were seen by their GP to review their 75+ Health Assessment only. For patients  
6 in the intervention group, the GP followed up on the 75+ Health Assessment, re-administered  
7 the GPCOG and provided care in the light of their recent education. Results of the GP-  
8 administered GPCOG were forwarded to the local study site headquarters. GPs were not  
9 informed of the outcome of the research nurse assessment until after the 12 month audit  
10  
11 Following their GP visit, patients and carers in the intervention group were asked to complete a  
12 short satisfaction survey regarding the use of the GPCOG by their GP. The survey was returned  
13 immediately to administrative staff at the GP surgery or to the study team via a reply-paid  
14 envelope.

### 25 26 *Study Outcomes*

27 The outcome measures (collected at baseline and 12 months) used to examine the effect of the  
28 educational intervention were:  
29

#### 30 31 *Primary Outcomes*

- 32 • World Health Organization Quality of Life Instrument (WHOQoL-BREF) scores for  
33 patients [39] (higher score indicative of higher quality of life)
- 34 • Geriatric Depression Scale (GDS) [40] scores for patients (score greater than five  
35 indicative of depression)

#### 36 37 *Secondary Outcomes*

- 38 • sensitivity and specificity of the second GP audit (prior to feedback on the first audit) for  
39 dementia compared with the revised Cambridge Cognitive Examination (CAMCOG-R), a  
40 brief neuropsychological test battery from The Cambridge Examination for Mental  
41 Disorders of the Elderly [36]. (score of <80 determined as indicating dementia for this  
42 study)
- 43 • the number of GP reported test types (pathology, pencil-and-paper, imaging) and  
44 referrals (specialist and support services) related to dementia,  
45  
46  
47  
48  
49  
50  
51  
52  
53  
54  
55  
56  
57  
58  
59  
60

- WHOQoL-BREF scores for carers,
- Beck Depression Inventory (BDI) [41] scores for carers (higher total scores over 13 indicative of more severe depressive symptoms),
- General Practice Assessment Questionnaire Version 2 (GPAQ) [42] scores for patients and carers. The GPAQ domains utilised in this study were related to GP communication (8 questions) and patient enablement following consultation with their GP (3 questions). Mean domain scores were transformed into a percentage of the maximum possible score, with higher scores indicative higher satisfaction or enablement.
- GP identification of differential diagnoses
- GP identification of reversible causes of dementia
- acceptability of memory screening using the GPCOG

Due to the low reporting of differential diagnoses or treatment of reversible causes of dementia by GPs at baseline and 12 months, the effect of the intervention on these secondary outcome measures [34] could not be evaluated.

### *Sample Size*

It was calculated that 45 patients with dementia in each group (waitlist and intervention) would give a power of 0.9 to detect a 7% difference between the change in pre and post scores on any of the four domain scales of the WHOQOL-BREF with a type 1 error of .05. Clustering within each GP was discounted, as each GP was not expected to have many patients in the study, but consideration was given to cluster correlations of patients within a GP practice. An intra-class correlation coefficient of 0.05 and an average cluster size of 5 patients with dementia in a practice, were used to calculate a design effect of 1.45 and a total sample size of 54 patients per group. Therefore in order to allow comparison of outcomes between the waitlist and intervention groups overall we aimed to recruit 168 participants with dementia (56 patients in the waitlist group; 112 in the intervention group). This sample size also allowed comparisons

1  
2  
3 within the intervention group, related to the benefits and acceptability of a screening or a case  
4 finding approach to dementia diagnosis (to be reported separately). We allowed for a 15% drop  
5 out over a 12 month period in this elderly patient group. Thus, based on a dementia prevalence  
6 of approximately 10% in over 75 year old Australians, we aimed to recruit a total of 2,000  
7 participants.  
8  
9  
10  
11

### 12 *Statistical Analyses*

13  
14 Sensitivity of the GP's diagnosis was calculated as the percentage of patients that the GP  
15 correctly classified as having dementia. Specificity was calculated as the percentage of patients  
16 that the GP correctly classified as not having dementia. The difference in sensitivity of GP  
17 diagnosis of dementia between the waitlist and intervention groups was tested by fitting a GEE  
18 model (specifically a Logistic Regression) to the population with CAMCOG < 80. The outcome in  
19 the model was whether the GP's diagnosis at the 12 month audit agreed with the classification  
20 given by the CAMCOG at 12 months. The predictor variable was group (Intervention or Waitlist)  
21 and the clustering variable was GP practice. Site was included as a categorical covariate. A  
22 similar model was used to test the difference in specificity between the groups by fitting a  
23 Logistic Regression GEE to the population with CAMCOG  $\geq 80$  at baseline.  
24  
25  
26  
27  
28  
29  
30  
31  
32  
33  
34

35 For other all other outcome measures, the average score was compared between intervention  
36 and waitlist groups using a Linear Regression GEE. The predictor variable of interest was group  
37 and the clustering variable was GP practice. Site was included as a categorical covariate.  
38  
39  
40  
41

42 Baseline scores were also included as a predictor.  
43  
44  
45  
46  
47  
48  
49  
50  
51  
52  
53  
54  
55  
56  
57  
58  
59  
60

## RESULTS

### *Characteristics of Participants*

Two thousand and thirty community dwelling participants aged 75 years or older were recruited via 168 GPs (Table 1). General practices were randomly allocated to the waitlist or intervention group, in a ratio of 1:2. The baseline characteristics and outcome measures for GP, patient and carer participants are shown in Tables 1 and 2.

The 12 months assessment was completed by 97% of GPs (98% waitlist; 96% intervention), 79% of patients (75% waitlist; 80% intervention) and 63% of carers (71% waitlist; 61% intervention), who entered the study (Figure 1).

### *Outcome Measures for Patients*

Outcome measures were examined for all patients, and separately for patients with CAMCOG-R dementia. In both populations, there was no significant difference in depression or quality of life domain scores for the waitlist and intervention groups at 12 months (Table 3). Satisfaction with GP communication was higher in the intervention group compared with control at 12 months for all patients ( $p=0.024$ ; odds ratio 2.1, 95% confidence interval 0.27 to 3.93) and for patients with CAMCOG-R dementia ( $p=0.007$ ; odds ratio 7.44, 95% confidence interval 2.02 to 12.86).

Of the 245 patients in the intervention group who returned their survey on acceptability of the GPCOG screening test administered by their GP, 68.4% liked the examination and a further 30.3% were neutral; 78.3% felt reassured that the GP had checked their memory and concentration, while less than 1% felt irritated or very irritated by the examination.

### *Detection of Dementia*

The percentage of patients with CAMCOG-R dementia who were correctly identified by the GP (as having possible, probable or definite dementia) was similar in the waitlist (43%) and intervention (45%) groups at baseline (Table 4). At 12 months following a single educational visit in the intervention group and prior to feedback on the baseline audit, there was an increase (to 65%) in the percentage of patients who were correctly identified as having dementia in the

1  
2  
3 intervention group but a decrease (to 29%) in the waitlist group (Table 4). We found that after  
4  
5 adjusting for baseline values, the sensitivity of GP judgment of dementia was significantly higher  
6  
7 in the intervention than the waitlist group at 12 months ( $p=0.002$ ; odds ratio 6.0, 95%  
8  
9 confidence interval 1.92 to 18.73). This means that GPs who had received training in the value of  
10  
11 diagnosing dementia and in the use of a screening instrument were more likely to detect  
12  
13 dementia than GPs who did not receive the training.

14  
15 Approximately 90% of patients without CAMCOG-R dementia were correctly identified by  
16  
17 waitlist and intervention GPs at baseline and 12 months. That is, the specificity of GP judgment  
18  
19 of dementia was approximately 90% at baseline and 88% at 12 months in both the waitlist and  
20  
21 intervention groups (Table 4). The lack of any significant difference in specificity between the  
22  
23 groups at 12 months ( $p=0.530$ ), indicates that the higher sensitivity in the intervention group  
24  
25 was not at a significant cost to specificity.

### 26 27 28 *Evidence Based Care for Dementia*

29  
30 The number of diagnostic assessment test types (pencil-and-paper, pathology and radiology)  
31  
32 and referrals (specialist and services) per patient was recorded at baseline (Table 2) and 12  
33  
34 months (Table 3) for those patients with a GP judgement of dementia. There was no difference  
35  
36 between the intervention and waitlist group in the number of tests or referrals per patient at  
37  
38 baseline (tests,  $p=0.05$ ; referrals,  $p=0.53$ ) or 12 months (tests,  $p=0.973$ ; referrals,  $p=0.429$ ).

### 39 40 41 *Outcome Measures for Carers of Patients with CAMCOG-R Dementia*

42  
43 Carer outcomes measures at 12 months (adjusted for baseline and site) are presented in Table 3.  
44  
45 There was no significant difference in depression or quality of life domain scores for the waitlist  
46  
47 and intervention groups at 12 months (Table 3). Carers in the intervention group had a higher  
48  
49 GPAQ enablement score ( $p=0.019$ ; odds ratio 24.77, 95% confidence interval 4.15 to 45.40) at  
50  
51 12 months.

## DISCUSSION

### *Principal Findings*

This study examined the effects of a dementia-related educational intervention for GPs. Quality of life outcomes for patients and carers were not affected by the intervention. There was however, a significant improvement in the identification of patients with dementia by GPs in the intervention compared with the waitlist group. The higher sensitivity of GP clinical judgement of dementia in the intervention group was not at a significant cost to specificity, which remained similar in the two groups. Satisfaction with GP communication was higher at follow-up in the intervention group compared with the waitlist group for all patients, and specifically for those with dementia. Carer satisfaction with GP communication was not significantly different between the groups at 12 months, however carers of people with dementia in the intervention group reported higher enablement (that is, better ability to understand and cope with their situation). We found no difference in GP management of dementia between intervention and control groups, based on the number of tests and referrals. It may be that the intervention had a stronger emphasis on identification of dementia than on management, due to the time spent addressing attitudinal barriers to dementia identification.

### *Comparison with Other Studies*

The improvement of dementia detection compared with waitlist by GPs following our practice-based educational intervention is consistent with previous studies using a small group workshop, decision support software or an interactive seminar approach [30, 31]. The GPCOG proved to be an effective element of the intervention [43]. Adherence to management guidelines was not improved by any of these interventions, but was improved in a study that combined the educational intervention with appointment of dementia care managers [44]. Despite the lack of any change in adherence to management guidelines in our study, in terms of test ordering and referrals, the improvement in satisfaction with GP communication and/or enablement in patients and carers in the intervention compared to the waitlist, suggest some other changes in GP management of dementia patients, not measured here.



1  
2  
3 Satisfaction with GP communication encompasses a number of factors (including provision of  
4 adequate time, exploring patients' needs, listening, explaining, giving information and sharing  
5 decisions) and is a strong predictor of overall satisfaction with primary care [45]. Effective GP-  
6 patient communication can potentially have a significant impact on patients' quality of life; it is  
7 positively associated with psychological quality of life in people with dementia and with  
8 physical, psychological, social and environmental quality of life in elderly patients without  
9 dementia [6]. Despite the higher satisfaction with GP communication found in this study, there  
10 was no concomitant difference in quality of life measures for patients or carers at 12 months as a  
11 result of the intervention. Importantly, the improvement in the rate of dementia identification in  
12 the intervention group compared to the waitlist, did not result in a decline in any of the quality  
13 of life domains, a concern expressed previously by both carers and GPs [46-48].

14  
15  
16  
17  
18  
19  
20  
21  
22  
23  
24  
25  
26 The improvement in enablement scores for carers of people with dementia in the intervention,  
27 compared to the waitlist group, at 12 months indicates carers' increased capacity and confidence  
28 with respect to treatment and self-management. Since enablement is related more to the  
29 communication and empathy characteristics of the GP, than to the fulfilment of patient or carer  
30 expectation regarding service outcomes [45, 49] there may have been some change in the GP  
31 management of dementia patients that was not captured by monitoring rates of tests and  
32 referrals. Unfortunately the improvement in enablement scores was not accompanied by any  
33 difference in quality of life scores for carers. Carers of people with dementia have a reduced  
34 quality of life compared to their contemporaries in the general population [50, 51]. There is little  
35 evidence that support-based interventions for caregivers of people with dementia are uniformly  
36 effective [52], although a manual based coping strategy programme reported reduced  
37 depression and improvement in carer quality of life [53]. The improved carer enablement in the  
38 intervention compared to the waitlist group, suggests that improved management of the person  
39 with dementia, combined with a targeted coping strategy for carers may have the potential to  
40 make significant improvements to carer quality of life.

### *Strengths and Limitations*

This study is strengthened by the use of individual and contemporaneous home assessment of each participant, meaning that the project assessed current dementia status using a standardised instrument (CAMCOG-R) rather than relying on administrative data such as GP records, commonly used in GP research. The educational intervention used activities that had proved effective in previous research; was specifically designed to address a number of identified barriers to GP identification and management of dementia; and was personalised to each GP. An additional strength is that the effect of the intervention was assessed not only on detection and management of dementia, but also on patient and carer outcomes, thus capturing the last (and essential) translational output from the intervention.

While retention of GPs in the study was excellent, a limitation was the relatively high (and differential) loss to follow-up of carers. The results relating to carers must, therefore, be interpreted with caution. The observed improvement in GP identification of dementia in the intervention group compared with waitlist did not lead to differences in management. Since GP learning was not directly measured, and the adherence to dementia guidelines was assessed by self-reporting of dementia related tests and referrals by GPs, it is possible that some may have improved their practice but did not record it. There are also indications from the communication and enablement data that some positive changes in intervention GPs' interaction with the patients and carer occurred and were not reflected in the self-reported management data. A further limitation is the higher socio economic status of the intervention patients at baseline. Poorer socioeconomic status has been linked among other things with shorter GP consultations and poorer patient enablement [54]. However, this difference was not reflected in any baseline differences in outcome measures between intervention and waitlist.

The relatively short follow up period for this study is also a limitation. In the literature, an educational intervention combined with structured care management resulted in a reduction in

1  
2  
3 the decline of health-related quality of life for dementia patients after 18 months, but not 12  
4 months [44] suggesting that improvements to quality of life measures may manifest slowly.  
5  
6

### 7 *Implications for Clinicians and Policymakers*

8  
9 This trial illustrates that a simple detailing intervention, though relatively costly compared with  
10 large group teaching, can produce significant improvements in GP dementia identification, and  
11 that these can translate into improved communication with consumers and enablement for  
12 carers of people with dementia. Given the huge impact that dementia will have on health  
13 services in the future, and the benefits to both the individual and the health system from timely  
14 diagnosis and carer enablement, this is an important finding for both clinicians and policy  
15 makers.  
16  
17  
18  
19  
20  
21  
22  
23

### 24 *Future Research & Conclusion*

25  
26 This trial raises a number of questions for future research. One concerns the best way to  
27 improve GP management of dementia according to guidelines. Dementia management is  
28 complex and ranges from diagnostic assessment through to a primary care team approach to  
29 those living with dementia in the community, and on to management in residential aged care.  
30 Further research on how best to do this, and also how best to teach it, is urgently needed.  
31  
32 Another question, concerns the long term effects of better identification of dementia; further  
33 longitudinal studies in primary care are needed for this. Funders should consider longitudinal  
34 studies of dementia in primary care which capture the experience of consumers and carers from  
35 prior to diagnosis, as in this study, and throughout their journey to explore the complex  
36 interactions between personal, health system and broader community factors on the dementia  
37 pathway.  
38  
39  
40  
41  
42  
43  
44  
45  
46  
47  
48  
49  
50  
51  
52  
53  
54  
55  
56  
57  
58  
59  
60

1  
2  
3 **Acknowledgements:** The authors acknowledge the invaluable contributions of Professor  
4 Charles Bridges-Webb, and the GP, patient and carer participants that made this study possible.

5  
6 **Funding:** This project was funded by the Australian National Health and Medical Research  
7 Council (Grant ID #351220 and #510745), Beyond Blue: The National Depression Initiative, and  
8 the Australian Government Department of Health and Ageing (Project # ITA195/0506). The  
9 funding body did not have a role in the study design, the collection, analysis, and interpretation  
10 of data or the writing of the article and the decision to submit it for publication. The authors  
11 analysed results and prepared this manuscript independently of the funding body.

12  
13 **Competing interests:** All authors have completed the ICMJE uniform disclosure form at  
14 [www.icmje.org/coi\\_disclosure.pdf](http://www.icmje.org/coi_disclosure.pdf) (available on request from the corresponding author) and  
15 declare that (1) DP and HB have sat on advisory boards for Pfizer, Novartis, Janssen, Lundbeck  
16 and Nutricia, and been speakers sponsored by Pfizer, Novartis (HB only) and Janssen (HB only).  
17 HB has been an investigator on projects funded by Pfizer, Novartis, Janssen, Lundbeck, Lilly and  
18 Sanofi, and acted as a consultant for Merck and Baxter; (2) All other authors have no competing  
19 interests to declare.

20  
21 **Details of contributors:** All authors had full access to data (including statistical reports and  
22 tables) and take responsibility for the integrity of the data and accuracy of the data analysis. CDP  
23 conceived and developed this study, drafted the manuscript, had overall management of the  
24 project and is guarantor. KM assisted in study design, data management and statistical analysis,  
25 and drafted the manuscript. NS assisted in study design, and managed operations at the Adelaide  
26 site. JG assisted in study design, and managed operations at the Melbourne site. JM assisted in  
27 study design. PD assisted in study design, and managed operations at the Bendigo site. PM  
28 assisted in study design and drafted the manuscript. NP developed the educational intervention,  
29 assisted in study design. GH developed the educational intervention, assisted in study design. SG  
30 assisted in study design, provided project management and drafted the manuscript. NW  
31 performed the statistical analyses. HB assisted in study design and managed operations at the  
32 Sydney site. All authors read and approved the final manuscript.

1  
2  
3 **Ethical approval:** Ethics approval was sought and granted initially from the Newcastle  
4 University Human Research Ethics Committee (Approval No. H-151-1205), and following this,  
5 from the appropriate Ethics Committees at each site. All participants gave  
6 written informed consent.  
7  
8  
9

10 **Data sharing:** no additional data available.  
11  
12  
13  
14  
15  
16  
17  
18  
19  
20  
21  
22  
23  
24  
25  
26  
27  
28  
29  
30  
31  
32  
33  
34  
35  
36  
37  
38  
39  
40  
41  
42  
43  
44  
45  
46  
47  
48  
49  
50  
51  
52  
53  
54  
55  
56  
57  
58  
59  
60

## REFERENCES

- [1] Prince M, Wimo A, Guerchet M, Ali G, Wu YT, and Prina M, *World Alzheimer Report 2015. The Global Impact of Dementia: An analysis of prevalence, incidence, cost and trends*. 2015, London: Alzheimer's Disease International (ADI).
- [2] Pinner G and Bouman WP, Attitudes of patients with mild dementia and their carers towards disclosure of the diagnosis. *International Psychogeriatrics*, 2003. **15**(3): 279-88.
- [3] Jha A, Tabet N, and Orrell M, To tell or not to tell-comparison of older patients' reaction to their diagnosis of dementia and depression. *Int J Geriatr Psychiatry*, 2001. **16**(9): 879-85.
- [4] Byszewski AM, Molnar FJ, Aminzadeh F, Eisner M, Gardezi F, and Bassett R, Dementia diagnosis disclosure: a study of patient and caregiver perspectives. *Alzheimer Dis Assoc Disord*, 2007. **21**(2): 107-14.
- [5] Livingston G, Sommerlad A, Orgeta V, Costafreda SG, Huntley J, Ames D, Ballard C, Banerjee S, Burns A, Cohen-Mansfield J, Cooper C, Fox N, Gitlin LN, Howard R, Kales HC, Larson EB, Ritchie K, Rockwood K, Sampson EL, Samus Q, Schneider LS, Selbaek G, Teri L, and Mukadam N, Dementia prevention, intervention, and care. *Lancet*, 2017. doi: 10.1016/S0140-6736(17)31363-6.2017.
- [6] Mate KE, Pond CD, Magin PJ, Goode SM, Mcelduff P, and Stocks NP, Diagnosis and disclosure of a memory problem is associated with quality of life in community based older Australians with dementia. *International Psychogeriatrics*, 2012. **24**(12): 1962-71.
- [7] Hurt CS, Banerjee S, Tunnard C, Whitehead DL, Tsolaki M, Mecocci P, Kloszewska I, Soininen H, Vellas B, and Lovestone S, Insight, cognition and quality of life in Alzheimer's disease. *J Neurol Neurosurg Psychiatry*, 2010. **81**(3): 331-6.
- [8] Bamford C, Lamont S, Eccles M, Robinson L, May C, and Bond J, Disclosing a diagnosis of dementia: a systematic review. *International Journal of Geriatric Psychiatry*, 2004. **19**(2): 151-69.
- [9] Phillips J., Pond D., and Shell A. No time like the present: the importance of a timely dementia diagnosis. 2010, Sydney: Alzheimer's Australia.
- [10] Valcour VG, Masaki KH, Curb JD, and Blanchette PL, The detection of dementia in the primary care setting. *Archives of Internal Medicine*, 2000. **160**(19): 2964-8.
- [11] Pentzek M, Wollny A, Wiese B, Jessen F, Haller F, Maier W, Riedel-Heller SG, Angermeyer MC, Bickel H, Mosch E, Weyerer S, Werle J, Bachmann C, Zimmermann T, Van Den Bussche H, Abholz HH, Fuchs A, and Agecode Study G, Apart from nihilism and stigma: what influences general practitioners' accuracy in identifying incident dementia? *American Journal of Geriatric Psychiatry*, 2009. **17**(11): 965-75.
- [12] Pond CD, Mate KE, Phillips J, Stocks NP, Magin PJ, Weaver N, and Brodaty H, Predictors of agreement between general practitioner detection of dementia and the revised Cambridge Cognitive Assessment (CAMCOG-R). *Int Psychogeriatr*, 2013. **25**(10): 1639-47.
- [13] Wilcock J, Iliffe S, Turner S, Bryans M, O'carroll R, Keady J, Levin E, and Downs M, Concordance with clinical practice guidelines for dementia in general practice. *Aging & Mental Health*, 2009. **13**(2): 155-61.
- [14] Phillips J, Pond D, and Goode S, *Timely diagnosis of dementia: Can we do better*. 2011, Alzheimer's Australia: Sydney.
- [15] Koch T and Iliffe S, Dementia diagnosis and management: a narrative review of changing practice. *Br J Gen Pract*, 2011. **61**(589): 513-25.
- [16] Cahill S, Clark M, Walsh C, O'connell H, and Lawlor B, Dementia in primary care: the first survey of Irish general practitioners. *International Journal of Geriatric Psychiatry*, 2006. **21**(4): 319-24.
- [17] Van Hout HPJ, Vernooij-Dassen MJ, and Stalman WaB, Diagnosing dementia with confidence by GPs. *Family Practice*, 2007. **24**(6): 616-21.
- [18] Boise L, Camicioli R, Morgan DL, Rose JH, and Congleton L, Diagnosing dementia: perspectives of primary care physicians. *Gerontologist*, 1999. **39**(4): 457-64.

- 1  
2  
3 [19] Phillipson L, Magee C, Jones S and Skladzien E, Exploring dementia and stigma beliefs. A  
4 pilot study of Australian adults aged 40 to 65 years. Sydney: Alzheimer's Australia, 2012.  
5 [20] Turner S, Iliffe S, Downs M, Wilcock J, Bryans M, Levin E, Keady J, and O'carroll R, General  
6 practitioners' knowledge, confidence and attitudes in the diagnosis and management of  
7 dementia. *Age & Ageing*, 2004. **33**(5): 461-7.  
8 [21] Turner S, Iliffe S, Downs M, Bryans M, Wilcock J, Austin T, Decision support software for  
9 dementia diagnosis and management in primary care:relevance and potential. *Aging &*  
10 *Mental Health*, 2003. **7**(1): 28-33.  
11 [22] Koch T and Iliffe S, Rapid appraisal of barriers to the diagnosis and management of patients  
12 with dementia in primary care: a systematic review. *BMC Family Practice*, 2010. **11**(52).  
13 [23] Iliffe S and Wilcock J, The identification of barriers to the recognition of, and response to,  
14 dementia in primary care using a modified focus group approach. *Dementia: The*  
15 *International Journal of Social Research and Practice*, 2005. **4**(1): 73-85.  
16 [24] Kaduszkiewicz H, Wiese B, and Van Den Bussche H, Self-reported competence, attitude and  
17 approach of physicians towards patients with dementia in ambulatory care: results of a  
18 postal survey. *BMC Health Services Research*, 2008. **8**: 54.  
19 [25] Koch T and Iliffe S, Dementia diagnosis and management: a narrative review of changing  
20 practice. *British Journal of General Practice*, 2011. **61**(589): e513-25.  
21 [26] Livingston G, Baio G, Sommerlad A, De Lusignan S, Poulimenos S, Morris S, Rait G, and Hoe J,  
22 Effectiveness of an intervention to facilitate prompt referral to memory clinics in the United  
23 Kingdom: Cluster randomised controlled trial. *PLoS Med*, 2017. **14**(3): e1002252.  
24 [27] Perry M, Draskovic I, Lucassen P, Vernooij-Dassen M, Van Achterberg T, and Rikkert MO,  
25 Effects of educational interventions on primary dementia care: A systematic review.  
26 *International Journal of Geriatric Psychiatry*, 2011. **26**(1): 1-11.  
27 [28] Wilcock J., Iliffe S., Griffin M., Jain P., Thuné-Boyle I., Lefford F., and D. R, Tailored educational  
28 intervention for primary care to improve the management of dementia: The EVIDEM-ED  
29 cluster Randomised Controlled Trial. *Trials* 2013. **14**: 397.  
30  
31 [29] Mukadam N, Cooper C, Kherani N, and Livingston G, A systematic review of interventions to  
32 detect dementia or cognitive impairment. *Int J Geriatr Psychiatry*, 2015. **30**(1): 32-45.  
33 [30] Downs M, Turner S, Bryans M, Wilcock J, Keady J, Levin E, O'carroll R, Howie K, and Iliffe S,  
34 Effectiveness of educational interventions in improving detection and management of  
35 dementia in primary care: cluster randomised controlled study. *BMJ*, 2006. **332**: 692-6.  
36 [31] Rondeau V, Allain H, Bakchine S, Bonet P, Brudon F, Chauplannaz G, Dubois B, Gallarda T,  
37 Lepine J-P, Pasquier F, Pouchain D, Ritchie K, Robert P, Touchon J, Vellas B, Vercelletto M,  
38 Verny M, Carcaillon L, Duveau F, Millet V, Tonelli I, Schuck S, and Dartigues J-F, General  
39 practice-based intervention for suspecting and detecting dementia in France: A cluster  
40 randomized controlled trial. *Dementia: The International Journal of Social Research and*  
41 *Practice*, 2008. **7**(4): 433-450.  
42 [32] Figueiras A, Sastre I, and Gestal-Otero JJ, Effectiveness of educational interventions on the  
43 improvement of drug prescription in primary care: a critical literature review. *Journal of*  
44 *Evaluation in Clinical Practice*, 2001. **7**(2): 223-41.  
45 [33] Bridges-Webb C WJ, Care of patients with dementia in general practice guidelines. 2003,  
46 North Sydney: NSW Department of Health.  
47 [34] Pond C, Brodaty H, Stocks N, Gunn J, Marley J, Disler P, Magin P, Paterson N, Horton G, Goode  
48 S, Paine B, and Mate K, Ageing in general practice (AGP) trial: a cluster randomised trial to  
49 examine the effectiveness of peer education on GP diagnostic assessment and management  
50 of dementia. *BMC Family Practice*, 2012. **13**(1): 12.  
51 [35] Britt H, Miller Gc, Charles J, Henderson J, Bayram C, Pan Y, Valenti L, Harrison C, O'halloran J,  
52 and Fahridin S. General practice activity in Australia 2009-10. 2010, General practice series  
53 no. 27. Cat. no. GEP 27. Available from: [http://www.aihw.gov.au/publication-](http://www.aihw.gov.au/publication-detail/?id=6442472433)  
54 [detail/?id=6442472433](http://www.aihw.gov.au/publication-detail/?id=6442472433).  
55  
56  
57  
58  
59



- 1  
2  
3 [36] Roth M, Huppert FA, Mountjoy CQ, and Tym E, CAMDEX-R: The Cambridge examination for  
4 mental disorders of the elderly - revised. 1998, Cambridge: Cambridge University Press.  
5 [37] Brodaty H, Kemp NM, and Low LF, Characteristics of the GPCOG, a screening tool for  
6 cognitive impairment. *International Journal of Geriatric Psychiatry*, 2004. **19**(9): p. 870-874.  
7 [38] Australian Bureau of Statistics, Census of population and housing: socio-economic indexes  
8 for areas (SEIFA), Australia. 2006, Canberra: ABS Cat. No. 2033.0.55.001).  
9 [39] Division of Mental Health and Prevention of Substance Abuse, Programme on Mental Health,  
10 WHOQOL Measuring quality of life. 1997, Geneva: World Health Organisation.  
11 [40] Sheikh JI and Yesavage JA, Geriatric Depression Scale (GDS): Recent evidence and  
12 development of a shorter version, in *Clinical Gerontology: A Guide to Assessment*. TL Brink,  
13 Editor. 1986, New York: Haworth Press p. 165-73.  
14 [41] Beck AT, Ward CH, Mendelson M, Mock J, and Erbaugh J, An inventory for measuring  
15 depression. *Arch Gen Psychiatry*, 1961. **4**: 561-71.  
16 [42] Mead N, Bower P, and Roland M, The General Practice Assessment Questionnaire (GPAQ) -  
17 development and psychometric characteristics. *BMC Fam Pract*, 2008. **9**: 13.  
18 [43] Brodaty H, Connors MH, Loy C, Teixeira-Pinto A, Stocks N, Gunn J, Mate KE, and Pond CD,  
19 Screening for Dementia in Primary Care: A Comparison of the GPCOG and the MMSE.  
20 *Dementia and Geriatric Cognitive Disorders*, 2016. **42**(5-6): 323-330.  
21 [44] Vickrey BG, Mittman BS, Connor KI, Pearson ML, Della Penna RD, Ganiats TG, Demonte RW,  
22 Jr., Chodosh J, Cui X, Vassar S, Duan N, and Lee M, The effect of a disease management  
23 intervention on quality and outcomes of dementia care: a randomized, controlled trial.  
24 *Annals of Internal Medicine*, 2006. **145**(10): 713-26.  
25 [45] Paddison CA, Abel GA, Roland MO, Elliott MN, Lyratzopoulos G, and Campbell JL, Drivers of  
26 overall satisfaction with primary care: evidence from the English General Practice Patient  
27 Survey. *Health Expect*, 2015. **18**(5): 1081-92.  
28 [46] Phillips J, Pond CD, Paterson NE, Howell C, Shell A, Stocks NP, Goode SM, and Marley JE,  
29 Difficulties in disclosing the diagnosis of dementia: a qualitative study in general practice.  
30 *British Journal of General Practice*, 2012. **62**(601): e546-53.  
31 [47] Maguire CP, Kirby M, Coen R, Coakley D, Lawlor BA, and O'neill D, Family members'  
32 attitudes toward telling the patient with Alzheimer's disease their diagnosis. *BMJ*, 1996.  
33 **313**(7056): 529-30.  
34 [48] Holroyd S, Turnbull Q, and Wolf A, What are patients and their families told about the  
35 diagnosis of dementia? Results of a family survey. *International Journal of Geriatric*  
36 *Psychiatry*, 2002. **17**: 218-221.  
37 [49] Mercer SW, Jani BD, Maxwell M, Wong SY, and Watt GC, Patient enablement requires  
38 physician empathy: a cross-sectional study of general practice consultations in areas of high  
39 and low socioeconomic deprivation in Scotland. *BMC Fam Pract*, 2012. **13**: 6.  
40 [50] Argimon JM, Limon E, Vila J, and Cabezas C, Health-related quality of life in carers of patients  
41 with dementia. *Fam Pract*, 2004. **21**(4): 454-7.  
42 [51] Zhang S, Edwards H, Yates P, Li C, and Guo Q, Self-Efficacy Partially Mediates between Social  
43 Support and Health-Related Quality of Life in Family Caregivers for Dementia Patients in  
44 Shanghai. *Dement Geriatr Cogn Disord*, 2013. **37**(1-2): 34-44.  
45 [52] Thompson CA, Spilbury K, Hall J, Birks Y, Barnes C, and Adamson J, Systematic review of  
46 information and support interventions for caregivers of people with dementia. *BMC Geriatr*,  
47 2007. **7**: 18.  
48 [53] Livingston G, Barber J, Rapaport P, Knapp M, Griffin M, King D, Livingston D, Mummery C,  
49 Walker Z, Hoe J, Sampson EL, and Cooper C, Clinical effectiveness of a manual based coping  
50 strategy programme (START, STrategies for RelaTives) in promoting the mental health of  
51 carers of family members with dementia: pragmatic randomised controlled trial. *BMJ*, 2013.  
52 **347**: f6276.  
53 [54] Mercer SW and Watt GC, The inverse care law: clinical primary care encounters in deprived  
54 and affluent areas of Scotland. *Ann Fam Med*, 2007. **5**(6): 503-10.  
55  
56  
57  
58  
59



Table 1| Characteristics of GPs, patients and carers in the Waitlist and Intervention groups at baseline.

| Class or mean (SD)                          |                 | Waitlist       | Intervention    | p-value |
|---------------------------------------------|-----------------|----------------|-----------------|---------|
| <b>Patient characteristics</b>              |                 | <b>(n=552)</b> | <b>(n=1478)</b> |         |
| Gender                                      | Male            | 259 (47%)      | 671 (45%)       | 0.5571  |
|                                             | Female          | 293 (53%)      | 805 (55%)       |         |
| Age (years)                                 | Mean (SD)       | 81.2 (4.4)     | 81.3 (4.2)      | 0.5184  |
| IRSAD <sup>a</sup>                          | Mean (SD)       | 6.7 (2.5)      | 7.1 (2.5)       | 0.0040  |
| CAMCOG score                                | Mean (SD)       | 90.6 (7.8)     | 90.0 (8.2)      | 0.1522  |
| CAMCOG diagnosis                            | Impaired        | 43 (7.8%)      | 124 (8.4%)      | 0.6871  |
|                                             | Not Impaired    | 505 (92%)      | 1352 (92%)      |         |
| <b>Carer characteristics</b>                |                 | <b>(n=21)</b>  | <b>(n=90)</b>   |         |
| Gender                                      | Male            | 6 (29%)        | 25 (28%)        | 0.9418  |
|                                             | Female          | 15 (71%)       | 65 (72%)        |         |
| Age (years)                                 | Mean (SD)       | 70.3 (12.8)    | 73.0 (16.3)     | 0.4800  |
| IRSAD                                       | Mean (SD)       | 6.9 (2.2)      | 6.5 (2.5)       | 0.315   |
| <b>General Practitioner characteristics</b> |                 | <b>(n=55)</b>  | <b>(n=113)</b>  |         |
| Gender                                      | Male            | 28 (58%)       | 63 (58%)        | 0.9501  |
|                                             | Female          | 20 (42%)       | 46 (42%)        |         |
| Age (years)                                 | Mean (SD)       | 51.5 (9.9)     | 50.4 (8.5)      | 0.4921  |
| Practice Size                               | Solo            | 10 (22%)       | 17 (16%)        | 0.4700  |
|                                             | 2-4 GPs         | 12 (27%)       | 38 (36%)        |         |
|                                             | More than 5 GPs | 23 (51%)       | 52 (49%)        |         |
| Number of patients in study                 | Mean (SD)       | 10.0 (6.6)     | 13.1 (11.6)     | 0.0707  |

<sup>a</sup> Index of Relative Social Advantage and Disadvantage

Table 2| Baseline outcome measures of patients, dementia patients and their carers in the Waitlist and Intervention groups.

|                                                       | Waitlist<br>Mean (SD)<br>(n=552) | Intervention<br>Mean (SD)<br>(n=1478) | p-value (GEE) |
|-------------------------------------------------------|----------------------------------|---------------------------------------|---------------|
| <b>Patient measures</b>                               |                                  |                                       |               |
| Geriatric Depression Scale (GDS)                      | 1.9 (1.9)                        | 2.1 (2.1)                             | 0.1616        |
| WHOQoL – BREF:                                        |                                  |                                       |               |
| Physical                                              | 70.4 (15.3)                      | 69.5 (15.0)                           | 0.1472        |
| Psychological                                         | 72.1 (12.9)                      | 70.8 (12.6)                           | 0.8118        |
| Social                                                | 79.7 (13.6)                      | 78.8 (13.2)                           | 0.2848        |
| Environmental                                         | 81.4 (10.8)                      | 80.6 (11.4)                           | 0.1529        |
| GPAQ:                                                 |                                  |                                       |               |
| Communication                                         | 81.4 (15.5)                      | 80.5 (14.4)                           | 0.3613        |
| Enablement                                            | 67.7 (31.8)                      | 66.0 (32.1)                           | 0.8721        |
| <b>GP management of dementia patients<sup>a</sup></b> | <b>(n=63)</b>                    | <b>(n=192)</b>                        |               |
| Number of tests per patient (0–3)                     | 0.79                             | 1.13                                  | 0.0505        |
| Number of referrals per patient (0–2)                 | 0.24                             | 0.31                                  | 0.5318        |
| <b>Dementia patient measures<sup>b</sup></b>          | <b>(n=43)</b>                    | <b>(n=124)</b>                        |               |
| Accessed Memory Services (% yes)                      | 6 (14%)                          | 13 (12%)                              | 0.4049        |
| Geriatric Depression Scale (GDS)                      | 3.5 (3.2)                        | 3.3 (2.8)                             | 0.4412        |
| WHOQoL – BREF:                                        |                                  |                                       |               |
| Physical                                              | 66.45 (15.94)                    | 63.80 (14.98)                         | 0.3544        |
| Psychological                                         | 67.44 (13.71)                    | 64.80 (12.56)                         | 0.4099        |
| Social                                                | 73.58 (12.90)                    | 76.65 (12.69)                         | 0.1112        |
| Environmental                                         | 76.04 (10.57)                    | 74.60 (14.01)                         | 0.6236        |
| GPAQ:                                                 |                                  |                                       |               |
| Communication                                         | 74.4 (14.2)                      | 75.8 (15.1)                           | 0.5928        |
| Enablement                                            | 57.0 (33.7)                      | 60.2 (34.6)                           | 0.7961        |
| <b>Carer measures</b>                                 | <b>(n=21)</b>                    | <b>(n=90)</b>                         |               |
| Beck Depression Inventory (BDI)                       | 10.3 (8.6)                       | 8.5 (6.3)                             | 0.2874        |
| WHOQoL – BREF:                                        |                                  |                                       |               |
| Physical                                              | 69.6 (16.7)                      | 70.2 (13.8)                           | 0.9966        |
| Psychological                                         | 68.4 (14.4)                      | 69.0 (10.9)                           | 0.7595        |
| Social                                                | 76.0 (19.2)                      | 77.1 (12.2)                           | 0.8294        |
| Environmental                                         | 77.5 (12.5)                      | 77.2 (11.6)                           | 0.9529        |
| GPAQ:                                                 |                                  |                                       |               |
| Communication                                         | 67.9 (21.1)                      | 78.4 (16.8)                           | 0.0426        |
| Enablement                                            | 50.0 (35.8)                      | 61.2 (36.4)                           | 0.1421        |

<sup>a</sup> participants with GP audit of possible, probable or definite dementia

<sup>b</sup> participants with CAMCOG < 80

Table 3| Twelve month outcome measures of patients, dementia patients and their carers in the Waitlist and Intervention groups

|                                                       |                    |                        | Intervention vs. Waitlist                                                           | Adjusted p-value (GEE) |
|-------------------------------------------------------|--------------------|------------------------|-------------------------------------------------------------------------------------|------------------------|
|                                                       | Waitlist Mean (SD) | Intervention Mean (SD) | Difference at 12 months adjusted for baseline and site Mean (95% CI) or OR (95% CI) |                        |
| <b>Patient measures</b>                               | <b>(n=416*)</b>    | <b>(n=1188*)</b>       |                                                                                     |                        |
| Geriatric Depression Scale (GDS)                      | 2.1 (2.2)          | 2.1 (2.0)              | -0.04 (-0.22 to 0.14)                                                               | 0.6832                 |
| WHOQoL – BREF:                                        |                    |                        |                                                                                     |                        |
| Physical                                              | 68.7 (15.6)        | 68.8 (14.9)            | 0.45 (-0.83 to 1.73)                                                                | 0.4880                 |
| Psychological                                         | 71.5 (12.9)        | 71.0 (12.3)            | 0.67 (-0.65 to 2)                                                                   | 0.3183                 |
| Social                                                | 77.7 (12.9)        | 77.1 (12.2)            | -0.04 (-1.5 to 1.42)                                                                | 0.9593                 |
| Environmental                                         | 81.1 (10.8)        | 79.9 (11.6)            | -0.35 (-1.77 to 1.07)                                                               | 0.6272                 |
| GPAQ:                                                 |                    |                        |                                                                                     |                        |
| Communication                                         | 78.3 (16.4)        | 79.7 (15.0)            | 2.1 (0.27 to 3.93)                                                                  | 0.0242                 |
| Enablement                                            | 63.4 (34.9)        | 64.3 (32.5)            | 1.23 (-3.71 to 6.18)                                                                | 0.6248                 |
| <b>GP management of dementia patients<sup>a</sup></b> | <b>(n=44)</b>      | <b>(n=166)</b>         |                                                                                     |                        |
| Number of tests per patient (0–3)                     | 0.64               | 0.55                   | OR: 1.01 (0.52 to 1.97)                                                             | 0.9729                 |
| Number of referrals per patient (0–2)                 | 0.16               | 0.18                   | OR: 1.50 (0.55 to 4.10)                                                             | 0.4285                 |
| <b>Dementia patient measures<sup>b</sup></b>          | <b>(n=34)</b>      | <b>(n=82)</b>          |                                                                                     |                        |
| Accessed Memory Services (% yes)                      | 3 (11%)            | 9 (13%)                | OR: 2.15 (0.32 to 14.49)                                                            | 0.4333                 |
| Geriatric Depression Scale (GDS)                      | 3.1 (2.9)          | 2.7 (2.0)              | -0.41 (-1.24 to 0.42)                                                               | 0.3335                 |
| WHOQoL – BREF:                                        |                    |                        |                                                                                     |                        |
| Physical                                              | 65.4 (16.0)        | 66.0 (12.6)            | 2.55 (-1.23 to 6.34)                                                                | 0.1864                 |
| Psychological                                         | 66.4 (15.0)        | 65.2 (12.6)            | 2.63 (-0.8 to 6.07)                                                                 | 0.1334                 |
| Social                                                | 73.6 (13.2)        | 75.0 (11.6)            | 0.79 (-3.7 to 5.29)                                                                 | 0.7297                 |
| Environmental                                         | 77.1 (13.6)        | 75.6 (12.2)            | 0.54 (-3.01 to 4.09)                                                                | 0.7660                 |
| GPAQ:                                                 |                    |                        |                                                                                     |                        |
| Communication                                         | 72.6 (18.6)        | 78.6 (15.3)            | 7.44 (2.02 to 12.86)                                                                | 0.0072                 |
| Enablement                                            | 55.8 (36.1)        | 63.9 (33.3)            | 5.65 (-8.68 to 19.98)                                                               | 0.4395                 |
| <b>Carer measures</b>                                 | <b>(n=15)</b>      | <b>(n=55)</b>          |                                                                                     |                        |
| Beck Depression Inventory (BDI)                       | 8.2 (6.2)          | 7.3 (4.4)              | -2.67 (-6.93 to 1.59)                                                               | 0.2195                 |
| WHOQoL – BREF:                                        |                    |                        |                                                                                     |                        |
| Physical                                              | 76.3 (10.4)        | 69.8 (12.3)            | -5.15 (-13.02 to 2.72)                                                              | 0.1995                 |
| Psychological                                         | 71.4 (7.6)         | 69.0 (11.3)            | 1.58 (-2.56 to 5.71)                                                                | 0.4556                 |
| Social                                                | 73.8 (16.0)        | 73.3 (13.5)            | 5.88 (-2.89 to 14.66)                                                               | 0.1889                 |
| Environmental                                         | 81.0 (6.5)         | 77.6 (11.1)            | -1.53 (-5.77 to 2.70)                                                               | 0.4786                 |
| GPAQ:                                                 |                    |                        |                                                                                     |                        |
| Communication                                         | 75.0 (13.2)        | 77.1 (19.0)            | 1.91 (-8.02 to 11.85)                                                               | 0.7060                 |
| Enablement                                            | 42.9 (33.8)        | 64.1 (37.1)            | 24.77 (4.15 to 45.40)                                                               | 0.0185                 |

<sup>a</sup> participants with GP audit of possible, probable or definite dementia at 12 months

<sup>b</sup> participants with CAMCOG < 80 at 12 months

Table 4| Sensitivity and specificity of the GP Audit (compared to CAMCOG-R, a standardized instrument used to measure the extent of dementia) in the Waitlist and Intervention groups at baseline and 12 months

|                          | Baseline            |                          | 12 months           |                          | Intervention vs. Waitlist<br>Difference at 12months <sup>a</sup><br>OR (95% CI) | Adjusted<br>p-value<br>(GEE) |
|--------------------------|---------------------|--------------------------|---------------------|--------------------------|---------------------------------------------------------------------------------|------------------------------|
|                          | Waitlist<br>(n=548) | Intervention<br>(n=1476) | Waitlist<br>(n=415) | Intervention<br>(n=1187) |                                                                                 |                              |
| Sensitivity <sup>b</sup> | 18 (43%)            | 55 (45%)                 | 7 (29%)             | 47 (65%)                 | 6.00 (1.92 to 18.73)                                                            | 0.0020                       |
| Specificity <sup>c</sup> | 429 (91%)           | 1196 (90%)               | 272(88%)            | 844 (88%)                | 0.79 (0.38 to 1.65)                                                             | 0.5298                       |

<sup>a</sup> adjusted for baseline and site

<sup>b</sup> patients with CAMCOG-R score <80 that were judged by GP as having possible, probable or definite dementia

<sup>c</sup> patients with CAMCOG-R score ≥80 that were judged not to have dementia by their GP

1  
2  
3  
4  
5  
6  
7  
8  
9  
10  
11  
12  
13  
14  
15  
16  
17  
18  
19  
20  
21  
22  
23  
24  
25  
26  
27  
28  
29  
30  
31  
32  
33  
34  
35  
36  
37  
38  
39  
40  
41  
42  
43  
44  
45  
46  
47  
48  
49  
50  
51  
52  
53  
54  
55  
56  
57  
58  
59  
60

**FIGURE LEGEND**

**Figure 1** Flow of participants through the study. Baseline patient interviews were conducted May 2007 to November 2009; 12 month interviews were conducted August 2008 to December 2010.

For peer review only

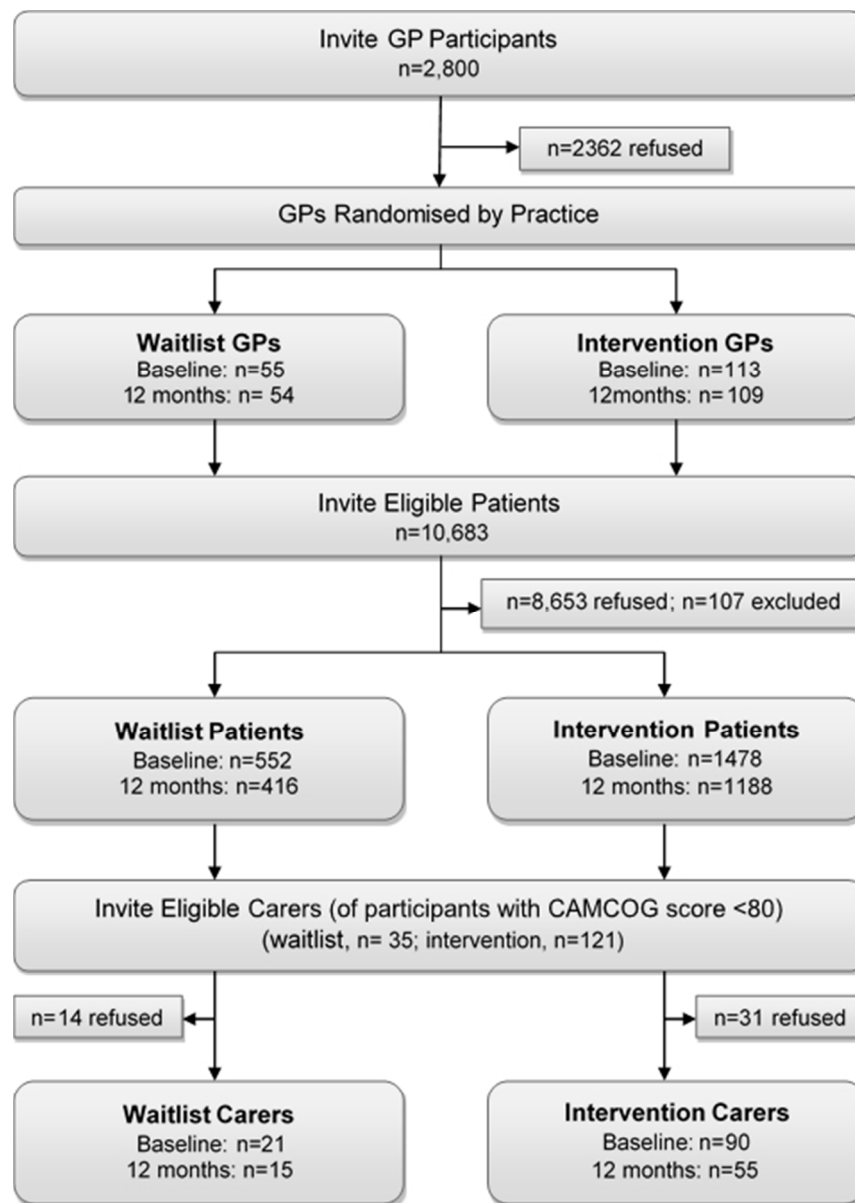

43x60mm (300 x 300 DPI)

## Checklist of Items for Reporting Trials of Nonpharmacologic Treatments\*

| Section                    | Item | Standard CONSORT Description                                                                                                                                                              | Extension for Nonpharmacologic Trials                                                                                                                                       | Reported on Page No.       |
|----------------------------|------|-------------------------------------------------------------------------------------------------------------------------------------------------------------------------------------------|-----------------------------------------------------------------------------------------------------------------------------------------------------------------------------|----------------------------|
| <b>Title and abstract†</b> | 1    | How participants were allocated to interventions (e.g., “random allocation,” “randomized,” or “randomly assigned”)                                                                        | In the abstract, description of the experimental treatment, comparator, care providers, centers, and blinding status                                                        | 2                          |
| <b>Introduction</b>        |      |                                                                                                                                                                                           |                                                                                                                                                                             |                            |
| Background                 | 2    | Scientific background and explanation of rationale                                                                                                                                        |                                                                                                                                                                             | 4-5                        |
| <b>Methods</b>             |      |                                                                                                                                                                                           |                                                                                                                                                                             |                            |
| Participants†              | 3    | Eligibility criteria for participants and the settings and locations where the data were collected                                                                                        | When applicable, eligibility criteria for centers and those performing the interventions                                                                                    | 6                          |
| Interventions†             | 4    | Precise details of the interventions intended for each group and how and when they were actually administered                                                                             | Precise details of both the experimental treatment and comparator                                                                                                           | 7                          |
|                            | 4A   |                                                                                                                                                                                           | Description of the different components of the interventions and, when applicable, descriptions of the procedure for tailoring the interventions to individual participants | 7<br>(and Pond et al 2012) |
|                            | 4B   |                                                                                                                                                                                           | Details of how the interventions were standardized                                                                                                                          | 7                          |
|                            | 4C   |                                                                                                                                                                                           | Details of how adherence of care providers with the protocol was assessed or enhanced                                                                                       | 7-8                        |
| Objectives                 | 5    | Specific objectives and hypotheses                                                                                                                                                        |                                                                                                                                                                             | 5                          |
| Outcomes                   | 6    | Clearly defined primary and secondary outcome measures and, when applicable, any methods used to enhance the quality of measurements (e.g., multiple observations, training of assessors) |                                                                                                                                                                             | 9-10                       |
| Sample size†               | 7    | How sample size was determined and, when applicable, explanation of any interim analyses and stopping rules                                                                               | When applicable, details of whether and how the clustering by care providers or centers was addressed                                                                       | 10                         |

|    |                                        |             |                                                                                                                                                                                                                                                                                                                                                             |                                                                                                                                                                       |                               |
|----|----------------------------------------|-------------|-------------------------------------------------------------------------------------------------------------------------------------------------------------------------------------------------------------------------------------------------------------------------------------------------------------------------------------------------------------|-----------------------------------------------------------------------------------------------------------------------------------------------------------------------|-------------------------------|
| 1  |                                        |             |                                                                                                                                                                                                                                                                                                                                                             |                                                                                                                                                                       |                               |
| 2  |                                        |             |                                                                                                                                                                                                                                                                                                                                                             |                                                                                                                                                                       |                               |
| 3  |                                        |             |                                                                                                                                                                                                                                                                                                                                                             |                                                                                                                                                                       |                               |
| 4  |                                        |             |                                                                                                                                                                                                                                                                                                                                                             |                                                                                                                                                                       |                               |
| 5  | Randomization–<br>sequence generation† | 8           | Method used to generate the random allocation<br>sequence, including details of any restriction<br>(e.g., blocking, stratification)                                                                                                                                                                                                                         | When applicable, how care providers were<br>allocated to each trial group                                                                                             | 6<br>(and Pond et al<br>2014) |
| 6  | Allocation concealment                 | 9           | Method used to implement the random<br>allocation sequence (e.g., numbered containers<br>or central telephone), clarifying whether the<br>sequence was concealed until interventions<br>were assigned                                                                                                                                                       |                                                                                                                                                                       | 6<br>(and Pond et al<br>2014) |
| 7  |                                        |             |                                                                                                                                                                                                                                                                                                                                                             |                                                                                                                                                                       |                               |
| 8  | Implementation                         | 10          | Who generated the allocation sequence, who<br>enrolled participants, and who assigned<br>participants to their groups                                                                                                                                                                                                                                       |                                                                                                                                                                       | 6                             |
| 9  |                                        |             |                                                                                                                                                                                                                                                                                                                                                             |                                                                                                                                                                       |                               |
| 10 | Blinding (masking)†                    | 11A         | Whether or not participants, those<br>administering the interventions, and those<br>assessing the outcomes were blinded to group<br>assignment                                                                                                                                                                                                              | Whether or not those administering co-<br>interventions were blinded to group assignment                                                                              | 7-8                           |
| 11 |                                        |             |                                                                                                                                                                                                                                                                                                                                                             |                                                                                                                                                                       |                               |
| 12 |                                        | 11B         |                                                                                                                                                                                                                                                                                                                                                             | If blinded, method of blinding and description of<br>the similarity of interventions†                                                                                 | 7-8                           |
| 13 |                                        |             |                                                                                                                                                                                                                                                                                                                                                             |                                                                                                                                                                       |                               |
| 14 | Statistical methods†                   | 12          | Statistical methods used to compare groups for<br>primary outcome(s); methods for additional<br>analyses, such as subgroup analyses and<br>adjusted analyses                                                                                                                                                                                                | When applicable, details of whether and how the<br>clustering by care providers or centers was<br>addressed                                                           | 10                            |
| 15 |                                        |             |                                                                                                                                                                                                                                                                                                                                                             |                                                                                                                                                                       |                               |
| 16 | <b>Results</b>                         |             |                                                                                                                                                                                                                                                                                                                                                             |                                                                                                                                                                       |                               |
| 17 | Participant flow†                      | 13          | Flow of participants through each stage (a<br>diagram is strongly recommended)---<br>specifically, for each group, report the numbers<br>of participants randomly assigned, receiving<br>intended treatment, completing the study<br>protocol, and analyzed for the primary<br>outcome; describe deviations from study as<br>planned, together with reasons | The number of care providers or centers<br>performing the intervention in each group and<br>the number of patients treated by each care<br>provider or in each center | Fig 1                         |
| 18 |                                        |             |                                                                                                                                                                                                                                                                                                                                                             |                                                                                                                                                                       |                               |
| 19 | Implementation of<br>intervention†     | New<br>item |                                                                                                                                                                                                                                                                                                                                                             | Details of the experimental treatment and<br>comparator as they were implemented                                                                                      | 11                            |
| 20 | Recruitment                            | 14          | Dates defining the periods of recruitment and<br>follow-up                                                                                                                                                                                                                                                                                                  |                                                                                                                                                                       | Fig 1                         |
| 21 |                                        |             |                                                                                                                                                                                                                                                                                                                                                             |                                                                                                                                                                       |                               |
| 22 | Baseline data†                         | 15          | Baseline demographic and clinical<br>characteristics of each group                                                                                                                                                                                                                                                                                          | When applicable, a description of care providers<br>(case volume, qualification, expertise, etc.) and<br>centers (volume) in each group                               | 12, Table 1                   |
| 23 |                                        |             |                                                                                                                                                                                                                                                                                                                                                             |                                                                                                                                                                       |                               |
| 24 |                                        |             |                                                                                                                                                                                                                                                                                                                                                             |                                                                                                                                                                       |                               |
| 25 |                                        |             |                                                                                                                                                                                                                                                                                                                                                             |                                                                                                                                                                       |                               |
| 26 |                                        |             |                                                                                                                                                                                                                                                                                                                                                             |                                                                                                                                                                       |                               |
| 27 |                                        |             |                                                                                                                                                                                                                                                                                                                                                             |                                                                                                                                                                       |                               |
| 28 |                                        |             |                                                                                                                                                                                                                                                                                                                                                             |                                                                                                                                                                       |                               |
| 29 |                                        |             |                                                                                                                                                                                                                                                                                                                                                             |                                                                                                                                                                       |                               |
| 30 |                                        |             |                                                                                                                                                                                                                                                                                                                                                             |                                                                                                                                                                       |                               |
| 31 |                                        |             |                                                                                                                                                                                                                                                                                                                                                             |                                                                                                                                                                       |                               |
| 32 |                                        |             |                                                                                                                                                                                                                                                                                                                                                             |                                                                                                                                                                       |                               |
| 33 |                                        |             |                                                                                                                                                                                                                                                                                                                                                             |                                                                                                                                                                       |                               |
| 34 |                                        |             |                                                                                                                                                                                                                                                                                                                                                             |                                                                                                                                                                       |                               |
| 35 |                                        |             |                                                                                                                                                                                                                                                                                                                                                             |                                                                                                                                                                       |                               |
| 36 |                                        |             |                                                                                                                                                                                                                                                                                                                                                             |                                                                                                                                                                       |                               |
| 37 |                                        |             |                                                                                                                                                                                                                                                                                                                                                             |                                                                                                                                                                       |                               |
| 38 |                                        |             |                                                                                                                                                                                                                                                                                                                                                             |                                                                                                                                                                       |                               |
| 39 |                                        |             |                                                                                                                                                                                                                                                                                                                                                             |                                                                                                                                                                       |                               |
| 40 |                                        |             |                                                                                                                                                                                                                                                                                                                                                             |                                                                                                                                                                       |                               |
| 41 |                                        |             |                                                                                                                                                                                                                                                                                                                                                             |                                                                                                                                                                       |                               |
| 42 |                                        |             |                                                                                                                                                                                                                                                                                                                                                             |                                                                                                                                                                       |                               |
| 43 |                                        |             |                                                                                                                                                                                                                                                                                                                                                             |                                                                                                                                                                       |                               |
| 44 |                                        |             |                                                                                                                                                                                                                                                                                                                                                             |                                                                                                                                                                       |                               |
| 45 |                                        |             |                                                                                                                                                                                                                                                                                                                                                             |                                                                                                                                                                       |                               |
| 46 |                                        |             |                                                                                                                                                                                                                                                                                                                                                             |                                                                                                                                                                       |                               |
| 47 |                                        |             |                                                                                                                                                                                                                                                                                                                                                             |                                                                                                                                                                       |                               |



1  
2  
3  
4  
5  
6  
7  
8  
9  
10  
11  
12  
13  
14  
15  
16  
17  
18  
19  
20  
21  
22  
23  
24  
25  
26  
27  
28  
29  
30  
31  
32  
33  
34  
35  
36  
37  
38  
39  
40  
41  
42  
43  
44  
45  
46  
47

|                         |    |                                                                                                                                                                                                           |                                                                                                                                                                       |                    |
|-------------------------|----|-----------------------------------------------------------------------------------------------------------------------------------------------------------------------------------------------------------|-----------------------------------------------------------------------------------------------------------------------------------------------------------------------|--------------------|
| Numbers analyzed        | 16 | Number of participants (denominator) in each group included in each analysis and whether analysis was by “intention-to-treat”; state the results in absolute numbers when feasible (e.g., 10/20, not 50%) |                                                                                                                                                                       | Tables 1-4         |
| Outcomes and estimation | 17 | For each primary and secondary outcome, a summary of results for each group and the estimated effect size and its precision (e.g., 95% confidence interval)                                               |                                                                                                                                                                       | 12-13 & Tables 1-4 |
| Ancillary analyses      | 18 | Address multiplicity by reporting any other analyses performed, including subgroup analyses and adjusted analyses, indicating those prespecified and those exploratory                                    |                                                                                                                                                                       | NA                 |
| Adverse events          | 19 | All important adverse events or side effects in each intervention group                                                                                                                                   |                                                                                                                                                                       | NA                 |
| <b>Discussion</b>       |    |                                                                                                                                                                                                           |                                                                                                                                                                       |                    |
| Interpretation†         | 20 | Interpretation of the results, taking into account study hypotheses, sources of potential bias or imprecision, and the dangers associated with multiplicity of analyses and outcomes                      | In addition, take into account the choice of the comparator, lack of or partial blinding, and unequal expertise of care providers or centers in each group            | 14                 |
| Generalizability†       | 21 | Generalizability (external validity) of the trial findings                                                                                                                                                | Generalizability (external validity) of the trial findings according to the intervention, comparators, patients, and care providers and centers involved in the trial | 15-16              |
| Overall evidence        | 22 | General interpretation of the results in the context of current evidence                                                                                                                                  |                                                                                                                                                                       | 14-17              |

\*Additions or modifications to the CONSORT checklist. CONSORT = Consolidated Standards of Reporting Trials.  
†This item was modified in the 2007 revised version of the CONSORT checklist.

# BMJ Open

## Effectiveness of a peer mediated educational intervention in improving general practitioner diagnostic assessment and management of dementia: a cluster randomised controlled trial

|                                 |                                                                                                                                                                                                                                                                                                                                                                                                                                                                                                                                                                                                                                                                                                                                                                                                                                                                                                                                                                                                                                                                                                                                                           |
|---------------------------------|-----------------------------------------------------------------------------------------------------------------------------------------------------------------------------------------------------------------------------------------------------------------------------------------------------------------------------------------------------------------------------------------------------------------------------------------------------------------------------------------------------------------------------------------------------------------------------------------------------------------------------------------------------------------------------------------------------------------------------------------------------------------------------------------------------------------------------------------------------------------------------------------------------------------------------------------------------------------------------------------------------------------------------------------------------------------------------------------------------------------------------------------------------------|
| Journal:                        | <i>BMJ Open</i>                                                                                                                                                                                                                                                                                                                                                                                                                                                                                                                                                                                                                                                                                                                                                                                                                                                                                                                                                                                                                                                                                                                                           |
| Manuscript ID                   | bmjopen-2017-021125.R1                                                                                                                                                                                                                                                                                                                                                                                                                                                                                                                                                                                                                                                                                                                                                                                                                                                                                                                                                                                                                                                                                                                                    |
| Article Type:                   | Research                                                                                                                                                                                                                                                                                                                                                                                                                                                                                                                                                                                                                                                                                                                                                                                                                                                                                                                                                                                                                                                                                                                                                  |
| Date Submitted by the Author:   | 25-May-2018                                                                                                                                                                                                                                                                                                                                                                                                                                                                                                                                                                                                                                                                                                                                                                                                                                                                                                                                                                                                                                                                                                                                               |
| Complete List of Authors:       | <p>Pond, Dimity; University of Newcastle, School of Medicine and Public Health<br/> Mate, Karen; University of Newcastle, School of Biomedical Sciences and Pharmacy<br/> Stocks, Nigel; University of Adelaide, Discipline of General Practice, Adelaide Medical School<br/> Gunn, Jane; University of Melbourne, Department of General Practice<br/> Disler, Peter; Monash University, School of Rural Health; The University of Melbourne, Department of Rural Health<br/> Magin, Parker; University of Newcastle, School of Medicine and Public Health<br/> Marley, John; University of Newcastle, School of Medicine and Public Health<br/> Paterson, Nerida; University of Newcastle, School of Medicine and Public Health<br/> Horton, Graeme; University of Newcastle, School of Medicine and Public Health<br/> Goode, Susan; University of Newcastle, School of Medicine and Public Health<br/> Weaver, Natasha; University of Newcastle, School of Medicine and Public Health<br/> Brodaty, Henry; University of New South Wales, Dementia Centre for Research Collaboration and the Centre for Healthy Brain Ageing, School of Psychiatry</p> |
| <b>Primary Subject Heading</b>: | General practice / Family practice                                                                                                                                                                                                                                                                                                                                                                                                                                                                                                                                                                                                                                                                                                                                                                                                                                                                                                                                                                                                                                                                                                                        |
| Secondary Subject Heading:      | Mental health, Geriatric medicine                                                                                                                                                                                                                                                                                                                                                                                                                                                                                                                                                                                                                                                                                                                                                                                                                                                                                                                                                                                                                                                                                                                         |
| Keywords:                       | GERIATRIC MEDICINE, MEDICAL EDUCATION & TRAINING, Dementia < NEUROLOGY, PRIMARY CARE                                                                                                                                                                                                                                                                                                                                                                                                                                                                                                                                                                                                                                                                                                                                                                                                                                                                                                                                                                                                                                                                      |
|                                 |                                                                                                                                                                                                                                                                                                                                                                                                                                                                                                                                                                                                                                                                                                                                                                                                                                                                                                                                                                                                                                                                                                                                                           |

SCHOLARONE™  
Manuscripts

1  
2  
3 *Prepared for BMJ Open*  
4  
5  
6  
7

8  
9 **Effectiveness of a peer mediated educational intervention in improving general**  
10 **practitioner diagnostic assessment and management of dementia: a cluster**  
11 **randomised controlled trial**  
12  
13

14  
15  
16  
17 Dimity Pond<sup>1</sup>, Karen Mate<sup>2</sup>, Nigel Stocks<sup>3</sup>, Jane Gunn<sup>4</sup>, Peter Disler<sup>5</sup>, Parker Magin<sup>1</sup>, John  
18 Marley<sup>1</sup>, Nerida Paterson<sup>1</sup>, Graeme Horton<sup>1</sup>, Susan Goode<sup>1</sup>, Natasha Weaver<sup>1</sup>, Henry  
19 Brodaty<sup>6</sup>  
20

21  
22 <sup>1</sup> School of Medicine & Public Health, University of Newcastle, NSW, Australia; <sup>2</sup> School of Biomedical Sciences  
23 and Pharmacy, University of Newcastle, NSW, Australia; <sup>3</sup>Discipline of General Practice, Adelaide Medical  
24 School, University of Adelaide, SA, Australia; <sup>4</sup> Department of General Practice, University of Melbourne, Victoria,  
25 Australia; <sup>5</sup>School of Rural Health, Monash University, Bendigo, Victoria, Australia; <sup>6</sup>Dementia Centre for  
26 Research Collaboration and the Centre for Healthy Brain Ageing, School of Psychiatry, University of New South  
27 Wales, NSW, Australia  
28  
29  
30  
31  
32  
33  
34  
35  
36  
37  
38  
39  
40  
41  
42  
43  
44  
45  
46  
47  
48

49 Correspondence should be addressed to:  
50 Dimity Pond  
51 School of Medicine and Public Health  
52 University of Newcastle, Callaghan, NSW, Australia, 2308  
53 Phone: +61 2 49686720; Fax: +61 2 49686727  
54 Email: Dimity.Pond@newcastle.edu.au  
55  
56  
57  
58  
59  
60

## ABSTRACT

**Objective** Test effectiveness of an educational intervention for general practitioners on quality of life and depression outcomes for patients.

**Design** Double blind, cluster randomised controlled trial.

**Setting** General practices in Australia between 2007 and 2010.

**Participants** General practices were randomly allocated to the waitlist (n=37) or intervention (n=66) group, in a ratio of 1:2. A total of 2,030 (1478 intervention; 552 waitlist) community dwelling participants aged 75 years or older were recruited via 168 GPs (113 intervention; 55 waitlist).

**Interventions** A practice-based academic detailing intervention led by a peer educator that included (i) training in use of the General Practitioner assessment of Cognition dementia screening instrument, (ii) training in diagnosis and management based on Royal Australian College of General Practitioners Dementia Guidelines (iii) addressing general practitioners' (GPs') barriers to dementia diagnosis, and (iv) a business case outlining a cost effective dementia assessment approach.

**Outcome Measures** Primary outcome measures were patient quality of life and depression; secondary outcome measures were (i) sensitivity and specificity of GP identification of dementia, (ii) referral to medical specialists and/or support services (iii) patient satisfaction with care, and (iv) carer quality of life, depression and satisfaction with care.

**Results** The educational intervention had no significant effect on patient quality of life or depression scores after 12 months. There were however improvements in secondary outcome measures including sensitivity of GP judgment of dementia ( $p=0.002$ ; odds ratio 6.0, 95% CI: 1.92-18.73), satisfaction with GP communication for all patients ( $p=0.024$ ; mean difference 2.1, 95% CI: 0.27-3.93) and for patients with dementia ( $p=0.007$ ; mean difference 7.44, 95% CI: 2.02-12.86) and enablement of carers ( $p=0.0185$ ; mean difference 24.77, 95% CI: 4.15-45.40).

**Conclusion** Practice based academic detailing did not improve patient quality of life or depression scores but did improve detection of dementia in primary care, patient satisfaction with GP communication.

**Trial Registration** ACTRN12607000117415

## Strengths and Limitations

- Individual and contemporaneous home assessments were completed for each participant, rather than relying on administrative data such as GP records.
- The educational intervention was specifically designed to address a number of identified barriers to GP identification and management of dementia and was also personalised to each GP.
- Evaluation measures included not only detection and management of dementia, but also patient and carer outcomes, thus capturing the last (and essential) translational output from the intervention.
- Findings relating to carers must be interpreted with caution due their relatively high (and differential) loss to follow-up.
- GP learning was not directly measured, and the adherence to dementia guidelines was assessed by self-reporting of dementia related tests and referrals by GPs.

## INTRODUCTION

Dementia is a complex and variable condition which affects cognition, behaviour and the person's ability to perform everyday tasks. The number of people living with dementia worldwide is currently estimated at 46.8 million. This number is expected to double by 2030 and almost triple by 2050, due to the increasing longevity of the world population [1]. As the number of people living with dementia increases, a shift from a specialist-led approach to a primary care based model would enable improved diagnosis and dementia care pathways to be implemented in an affordable manner [2]. Primary care is "more local, more holistic and personalised, and more comprehensive, integrated and continuous" than secondary care [2], and thus well placed to provide dementia identification and management and integration across primary health and social care services. This accords with the World Health Organization (WHO) identifying integrated care for the elderly at the centre of a new initiative [3]. Primary care physicians can attain similar outcomes to specialists when given responsibility for dementia care [4], with further improvements attainable given appropriate training, mentoring and resources.

Timely diagnosis and management of dementia is desired by many patients with dementia and their carers [5-7], to improve their access to interventions and support at the most appropriate time [8]. Diagnostic disclosure of memory problems is associated with better physical and environmental quality of life (QoL) in people with dementia [9], and is not associated with poorer health-related QoL [10]. A timely diagnosis may help people with dementia, and their carers, understand and cope with the challenging symptoms of dementia, fulfil short-term goals and facilitate planning for the future while they are still competent to do so [11, 12]. Referral can be made for social support services and specialist treatments, including anti-Alzheimer's medications that may slow the course of cognitive decline. [2, 4]

General practitioners fail to identify about 50% of mild dementia cases in the community [13-15] and demonstrate gaps in recorded diagnostic processes against guidelines [16]. A number of

1  
2  
3 barriers to diagnosis of dementia can be attributed to patient, carer, general practitioner (GP)  
4 and systemic factors [17, 18]. The gradual decline in functional ability in the early stages of  
5 dementia can be attributed to 'normal' ageing, not only by persons with the condition or those  
6 close to them, but also by their GPs [19-21]. The stigma associated with dementia may delay  
7 help seeking [22]. Only one in five people who mention memory problems to their GP have  
8 dementia [15], so the GP may choose to observe such a patient, rather than proceeding early to  
9 what may be perceived as an expensive and alarming diagnostic assessment. Other GP-related  
10 barriers to early diagnosis include lack of knowledge [12] and/or confidence [19, 20, 23-26], the  
11 reality that dementia diagnosis is difficult due to slow and fluctuating onset and overlap of  
12 symptoms with other diseases, lack of a definitive diagnostic test[25], and the perception of  
13 dementia diagnosis as a specialist domain [27]. No medication exists which will effectively  
14 reverse or halt the progress of these disorders, and GPs may not conceptualise social and system  
15 support for ongoing cognitive decline as therapeutic and this nihilism may also hinder  
16 management [28, 29].

17  
18  
19 GPs' detection and management of dementia have been addressed in several educational  
20 interventions with varying success [18, 30-34]. Large seminar-based interventions have limited  
21 effectiveness [28], however educational interventions that incorporated active small-group  
22 learning tasks have improved detection of dementia [32, 33]. The most effective educational  
23 strategies in the general practice setting incorporate an academic detailing approach [35, 36]  
24 that presents evidence based content in an engaging and clinically relevant manner, whilst  
25 allowing flexibility to address the needs and concerns of individual practitioners [34] [37].

26  
27  
28 The objective of this study was to determine the effectiveness of an educational intervention  
29 that included an academic detailing visit to each practice, using model cases to illustrate case  
30 identification and management and designed to address individual GP needs. The barriers to GP  
31 diagnosis and management of dementia addressed were: the limited time available for  
32 consultation, attitudinal factors, and lack of relevant knowledge. Further discussion with the GP

1  
2  
3 elicited and addressed any additional barriers. Primary outcomes were patient focussed (QoL  
4 and depression scores); secondary outcome measures included GP and carer factors.  
5  
6  
7  
8  
9  
10  
11  
12  
13  
14  
15  
16  
17  
18  
19  
20  
21  
22  
23  
24  
25  
26  
27  
28  
29  
30  
31  
32  
33  
34  
35  
36  
37  
38  
39  
40  
41  
42  
43  
44  
45  
46  
47  
48  
49  
50  
51  
52  
53  
54  
55  
56  
57  
58  
59  
60

For peer review only



## METHODS

### *Study Design*

This study (the AGP trial) was a cluster randomised trial with a 12 month follow-up. A parallel design was employed. Practices with participating general practitioners (GPs) were randomly allocated in a ratio of 2:1 to either an intervention or waitlist group. Intervention practices (n=66) received a dementia related educational peer outreach visit, and completed two patient audits with feedback. Waitlist practices (n=37) completed two audits without feedback and were mailed the then-current Royal Australian College of General Practitioners (RACGP) Dementia Guidelines at 12 months [38]. The rationale and study design have been reported in detail previously [39].

### *Participants*

Practices eligible for inclusion in the study were located within 30km of each urban study site headquarters (Sydney, Newcastle, Melbourne, Adelaide) or from the rural study site of Bendigo or its surrounding towns; had community dwelling patients aged  $\geq 75$  years; and used a computerised patient database. GPs that had been involved in development of the project were excluded. The cluster randomisation has been described elsewhere [39]. Briefly, a list of all eligible practices was compiled and sent to an independent party, the Centre for Epidemiology and Biostatistics at the University of Newcastle (CCEB), for randomisation. CCEB provided the approach order for the practices. A project nurse or GP visited each practice to explain the project and recruit GPs prior to allocation of the practice to intervention or waitlist. Practices were stratified by site, and by size of practice as either standard or large (>5 GPs working in the practice), and then allocated to intervention or waitlist in a ratio of 2:1 in randomly rotated blocks of 3 and 6. Of the 2,800 GPs approached, 168 (6%) entered the study. This sample was representative based on comparison with demographics of all active recognised GPs in Australia [40].

1  
2  
3 GPs sent letters of invitation to all patients who met the inclusion criteria, inviting them to  
4 participate in the study. Those who agreed to participate responded by returning a consent form  
5 to the local study site. Patients eligible for inclusion in the study were aged  $\geq 75$  years, had  
6 visited their GP within the last 24 months, and were able to speak and understand English. The  
7 exclusion criteria were Parkinson's disease, multiple sclerosis, motor neuron disease, central  
8 nervous system inflammation, psychotic symptoms prior to recruitment, developmental  
9 disability, progressive malignancy or substance abuse, too sick to complete the study, or  
10 resident of aged care facility at entry to the study.  
11  
12  
13  
14  
15  
16  
17  
18

19 Carers of patients were eligible for the study if they had been identified as a carer or support  
20 person by a patient scoring  $<80$  on the revised Cambridge Cognitive Examination (CAMCOG-R)  
21 [41], had prior consent from the patient with dementia for his/her carer to participate and were  
22 able to speak and understand English. Eligible carers were provided with an information pack  
23 and a letter of invitation. Those who agreed to participate responded by returning a consent  
24 form to the local study site.  
25  
26  
27  
28  
29  
30  
31

### 32 ***Patient and public involvement***

34 Local reference groups at the Newcastle and Sydney sites included representatives of  
35 Alzheimer's Australia (now Dementia Australia) to provide patients' and carers' perspectives in  
36 best practice management of dementia. The reference groups (that also included members of  
37 local divisions of general practice, geriatricians and practice nurses) provided stakeholder input  
38 into the study protocol, requested wording changes to proposed information and consent forms,  
39 considered the RACGP dementia guidelines and adapted them for local use e.g. developed a list  
40 of local services for patients with dementia.  
41  
42  
43  
44  
45  
46  
47

48 Acceptability of the interview process, and dementia screening were measured. Participants  
49 were asked to complete a short survey, which was returned to the local study site in a reply-paid  
50 envelope to avoid bias due to the presence of the nurse or practice staff.  
51  
52  
53  
54  
55  
56  
57  
58  
59  
60

1  
2  
3 Results of the interview process were provided to patients via their GP to ensure that they were  
4 understood and discussed as appropriate.  
5

### 6 7 **Intervention**

8  
9 The intervention in this study consisted of an educational academic detailing session conducted  
10 at each GP's surgery by a trained peer medical or nurse educator. GPs completed an audit of  
11 their patients prior to the education, in order to obtain a baseline measure of their dementia  
12 diagnosis rates and management practices. The educational session that followed included (i)  
13 instruction in the use of the General Practitioner assessment of Cognition (GPCOG) dementia  
14 screening instrument [42], (ii) an interactive presentation on dementia diagnosis, diagnostic  
15 workup and management based on the RACGP Dementia Guidelines[38], (iii) an exploration of  
16 the GP's perceived barriers to dementia diagnosis, and (iv) a business case outlining the cost  
17 recovery potential of dementia assessment in terms of the Australian government's Medicare  
18 Benefits Schedule. The systemic issue of lack of time in the GP consultation was addressed by  
19 training the GPs in the use of a brief screening instrument and by discussing potential methods  
20 of obtaining assistance from the practice nurse. Case studies were used to illustrate appropriate  
21 management including behavioural, environmental and pharmacological strategies; when to  
22 refer to support services (e.g Aged Care Assessment Team, Memory assessment unit,  
23 Alzheimer's Australia, Meals on Wheels, respite care), solicitor or specialists; and carer health.  
24 Intervention GPs were provided with a full copy of the RACGP Dementia Guidelines, as well as an  
25 A4-sized summary poster at the conclusion of the academic detailing visit. A second audit was  
26 held at 12 months in order to determine the effect of the educational intervention on outcome  
27 measures while allowing sufficient time for the GP to have seen the patient several times.  
28 Following the second audit, GPs were provided with the results of the comprehensive nurse  
29 assessments conducted at baseline and 12 months, and offered an opportunity for self-reflection  
30 and discussion with their academic detailer.  
31  
32  
33  
34  
35  
36  
37  
38  
39  
40  
41  
42  
43  
44  
45  
46  
47  
48  
49  
50  
51  
52  
53  
54  
55  
56  
57  
58  
59  
60

1  
2  
3 Waitlist GPs completed two audits (baseline and 12 months) of their patients. Waitlist GPs were  
4 mailed a written summary of their patient's home assessment and the RACGP Dementia  
5  
6 Guidelines after completion of the 12 month audit.  
7  
8  
9

### 10 **Data Collection**

11  
12 At baseline, waitlist and intervention GPs received a list of their participating patients to audit.  
13  
14 This audit task required GPs to provide their clinical judgement in relation to each patient's  
15 dementia status using one of four options: No Dementia, Possible Dementia, Probable Dementia,  
16  
17 Definite Dementia. GPs completed a supplementary audit for any patients with possible,  
18  
19 probable or definite dementia to gather data on memory related tests and investigations  
20  
21 performed (i.e. paper and pencil test for cognition or depression; pathology; radiology) and  
22  
23 referrals to services (including care services, memory assessment services and the Aged care  
24  
25 Assessment Team, and medical specialists). Differential diagnosis and identification of reversible  
26  
27 causes were also requested. This audit was repeated at 12 months. Although GPs were aware  
28  
29 that there were intervention and waitlist groups, they were not informed of their group  
30  
31 allocation; both groups participated in the audit.  
32  
33  
34

35  
36 Patient and carer assessments were conducted at their home by a research nurse at baseline and  
37  
38 12 months. Information was collected from patients and carers relating to their personal and  
39  
40 social circumstances including socioeconomic status using the Index of Relative Social  
41  
42 Advantage and Disadvantage (IRSAD) [43], quality of life, depression and satisfaction with GP  
43  
44 care. The cognitive function of patients was assessed using the GPCOG and CAMCOG-R. All  
45  
46 nurses were trained in administration of each instrument and adhered to a standardised  
47  
48 interview protocol to minimise interviewer bias. The specific patient characteristics collected  
49  
50 and the instruments and criteria used have been described previously [9, 15]. If requested by the  
51  
52 GP, the nurse also conducted a "75+ Health Assessment", an item that can be rebated under the  
53  
54 Australian Medicare system. These data were not used by the study, but were returned to the GP  
55  
56  
57  
58  
59  
60

1  
2  
3 for his or her use. Research nurses and patients were blinded to the group allocation for the  
4  
5 entire study.  
6

7  
8 At the completion of the baseline assessment, each patient received a letter prepared by the  
9  
10 project manager, directing them to obtain an appointment with his/her GP. Patients in the  
11  
12 waitlist group, were seen by their GP to review their 75+ Health Assessment only. For patients  
13  
14 in the intervention group, the GP followed up on the 75+ Health Assessment, re-administered  
15  
16 the GPCOG and provided care in the light of their recent education. Results of the GP-  
17  
18 administered GPCOG were forwarded to the local study site headquarters. GPs were not  
19  
20 informed of the outcome of the research nurse assessment until after the 12 month audit, in  
21  
22 order to determine the effectiveness of the GP education process on GP diagnosis and  
23  
24 management of patients over the 12 month study period. Following their GP visit, patients and  
25  
26 carers in the intervention group were asked to complete a short satisfaction survey regarding  
27  
28 the use of the GPCOG by their GP. The survey was returned immediately to administrative staff  
29  
30 at the GP surgery or to the study team via a reply-paid envelope.  
31

### 32 33 **Study Outcomes**

34  
35 The outcome measures (collected at baseline and 12 months) used to examine the effect of the  
36  
37 educational intervention were:

#### 38 39 *Primary Outcomes*

- 40  
41
- 42 • World Health Organization Quality of Life Instrument (WHOQoL-BREF) scores for  
43 patients [44] (higher score indicative of higher quality of life)  
44
  - 45 • Geriatric Depression Scale (GDS) [45] scores for patients (score greater than five  
46  
47 indicative of depression)  
48

#### 49 50 *Secondary Outcomes*

- 51
- 52 • Sensitivity and specificity of GP identification of dementia compared with the revised  
53  
54 Cambridge Cognitive Examination (CAMCOG-R), a brief neuropsychological test battery  
55  
56 from The Cambridge Examination for Mental Disorders of the Elderly [41]. A cut point of  
57  
58

1  
2  
3 79/80 differentiates between those having dementia and those not having dementia  
4 with 93% sensitivity and 87% specificity [46]. For the purposes of this study a CAMCOG-  
5 R score of less than 80 was used as an indicator of dementia.  
6  
7

- 8 • the number of GP reported test types (pathology, pencil-and-paper, imaging) and  
9 referrals (specialist and care support services) related to dementia,  
10  
11
- 12 • WHOQoL-BREF scores for carers,  
13
- 14 • Beck Depression Inventory (BDI) [47] scores for carers (higher total scores over 13  
15 indicative of more severe depressive symptoms),  
16  
17
- 18 • General Practice Assessment Questionnaire Version 2 (GPAQ) [48] scores for patients  
19 and carers. The GPAQ domains utilised in this study were related to GP communication  
20 (8 questions) and patient enablement following consultation with their GP (3 questions  
21 related to patients' ability to understand and cope with their illness or problem). Mean  
22 domain scores were transformed into a percentage of the maximum possible score, with  
23 higher scores indicative higher satisfaction or enablement.  
24  
25
- 26 • GP identification of differential diagnoses  
27  
28
- 29 • GP identification of reversible causes of dementia (e.g. depression, vitamin B12  
30 deficiency, hypothyroidism, adverse drug reaction)  
31  
32
- 33 • acceptability of memory screening using the GPCOG  
34  
35
- 36 • specialist and care services accessed  
37  
38  
39  
40

41 Due to the low reporting of differential diagnoses or treatment of reversible causes of dementia  
42 by GPs at baseline and 12 months, the effect of the intervention on these secondary outcome  
43 measures [39] could not be evaluated. Likewise, the dementia management practices of GPs  
44 during the study period, such as referral to specialists or care support services, and the services  
45 actually accessed by participants were not effectively captured. The effect of the intervention on  
46 these secondary outcomes related to management of dementia could therefore not be  
47  
48  
49  
50  
51  
52  
53  
54 determined.  
55  
56  
57  
58  
59  
60

### **Sample Size**

We calculated that a total sample size of 150 dementia patients would have 90% power to detect a mean difference of 7.0 between waitlist and intervention in the change in pre- and post- scores on any of the four domain scales of the WHOQOL-BREF with a Type I Error rate of 0.05. The standard deviation used was 18.5 and the overall correlation between pre- and post- scores was assumed to be 0.7. The study would also have 90% power to detect a mean difference of 0.9 on the 15-point GDS, assuming a standard deviation of 2.4 [42] and using the same set of assumptions for alpha and correlations.

The estimated sample size was adjusted for correlation due to clustering of patients within GP practices. Clustering within GP practices was discounted, as each GP was expected to have very few patients in the study. Assuming an intra-class correlation coefficient of 0.05 and an average cluster size of five patients per practice, the design effect is 1.2 and a total of 180 patients would be required.

An allocation of two patients in the intervention group for each patient in the control group also allowed comparisons within the intervention group related to the benefits and acceptability of a screening or case-finding approach to dementia diagnosis (to be reported separately). Therefore 68 patients in the waitlist control group and 135 patients in the intervention group were required.

We allowed for a 15% drop out over a 12 month in this elderly patient group. Thus, based on a dementia prevalence of approximately 10% in Australians aged over 75 years, we aimed to recruit a total of 2,400 participants.

### **Statistical Analyses**

Sensitivity of the GP's diagnosis was calculated as the percentage of patients that the GP correctly classified as having dementia. Specificity was calculated as the percentage of patients that the GP correctly classified as not having dementia. The difference in sensitivity of GP diagnosis of dementia between the waitlist and intervention groups was tested by fitting a GEE

1  
2  
3 model (specifically a Logistic Regression) to the population with CAMCOG<80. The outcome in  
4 the model was whether the GP's diagnosis at the 12 month audit agreed with the classification  
5 given by the CAMCOG at 12 months. The predictor variable was group (Intervention or Waitlist)  
6 and the clustering variable was GP practice. Site was included as a categorical covariate. A  
7 similar model was used to test the difference in specificity between the groups by fitting a  
8 Logistic Regression GEE to the population with CAMCOG  $\geq 80$  at baseline.

9  
10  
11 For all other outcome measures, the average score was compared between intervention and  
12 waitlist groups using a Linear Regression GEE. The predictor variable of interest was group and  
13 the clustering variable was GP practice. Site was included as a categorical covariate. Baseline  
14 scores were also included as a predictor.  
15  
16  
17  
18  
19  
20  
21  
22  
23  
24  
25  
26  
27  
28  
29

## 30 RESULTS

### 31 *Characteristics of Participants*

32  
33 Of 2030 community dwelling participants aged 75 years or older recruited via 168 GPs (Table  
34 1), 43 in the waitlist and 124 in the intervention group had dementia diagnosed as per the  
35 CAMCOG. The baseline characteristics and outcome measures for GP, patient and carer  
36 participants are shown in Tables 1 and 2.  
37  
38  
39  
40  
41

42 The 12 months assessment was completed by 97% of GPs (98% waitlist; 96% intervention),  
43 79% of patients (75% waitlist; 80% intervention) and 63% of carers (71% waitlist; 61%  
44 intervention), who entered the study (Figure 1).  
45  
46  
47  
48

### 49 *Primary Outcome Measures*

50 Outcome measures were examined for all patients, and separately for patients with CAMCOG-R  
51 dementia. In both populations, there was no significant difference in depression (all patients,  
52  $p=0.683$ ; patients with dementia,  $p=0.333$ ) or quality of life domain scores (all patients:  $p=0.488$   
53  
54  
55  
56  
57  
58  
59  
60



(physical),  $p=0.318$  (psychological),  $p=0.959$  (social),  $p=0.627$  (environmental); patients with dementia:  $p=0.186$  (physical),  $p=0.133$  (psychological),  $p=0.730$  (social),  $p=0.766$  (environmental)) for the waitlist and intervention groups at 12 months (Table 3).

## **Secondary Outcome Measures**

### *Detection of Dementia*

The percentage of patients with CAMCOG-R dementia who were correctly identified by the GP (as having possible, probable or definite dementia) was similar in the waitlist (43%) and intervention (45%) groups at baseline (Table 4). At 12 months following a single educational visit in the intervention group and prior to feedback on the baseline audit, there was an increase (to 65%) in the percentage of patients who were correctly identified as having dementia in the intervention group but a decrease (to 29%) in the waitlist group (Table 4). After adjusting for baseline values, the sensitivity of GP judgment of dementia was significantly higher in the intervention than the waitlist group at 12 months ( $p=0.002$ ; odds ratio 6.0, 95% confidence interval 1.92 to 18.73). This means that GPs who had received training in the value of diagnosing dementia and in the use of a screening instrument were more likely to detect dementia than GPs who did not receive the training.

Approximately 90% of patients without CAMCOG-R dementia were correctly identified by waitlist and intervention GPs at baseline and 12 months. That is, the specificity of GP judgment of dementia was approximately 90% at baseline and 88% at 12 months in both the waitlist and intervention groups (Table 4). The lack of any significant difference in specificity between the groups at 12 months ( $p=0.530$ ), indicates that the higher sensitivity in the intervention group was not at a significant cost to specificity. The number of diagnostic assessment test types (pencil-and-paper, pathology and radiology) and referrals (specialist and services) per patient was recorded at baseline (Table 2) and 12 months (Table 3) for those patients with a GP judgement of dementia. There was no difference between the intervention and waitlist group in the number of tests or referrals per patient at baseline (tests,  $p=0.05$ ; referrals,  $p=0.53$ ) or 12 months (tests,  $p=0.973$ ; referrals,  $p=0.429$ ).

### *Satisfaction with Care*

Satisfaction with GP communication was higher in the intervention group compared with control at 12 months for all patients ( $p=0.024$ ; mean difference 2.1, 95% confidence interval 0.27 to 3.93) and for patients with CAMCOG-R dementia ( $p=0.007$ ; mean difference 7.44, 95% confidence interval 2.02 to 12.86).

Of the 245 patients in the intervention group who returned their survey on acceptability of the GPCOG screening test administered by their GP, 68.4% liked the examination and a further 30.3% were neutral; 78.3% felt reassured that the GP had checked their memory and concentration, while less than 1% felt irritated or very irritated by the examination.

### *Secondary Outcome Measures for Carers of Patients with CAMCOG-R Dementia*

Carer outcomes measures at 12 months (adjusted for baseline and site) are presented in Table 3. There was no significant difference in depression or quality of life domain scores for the waitlist and intervention groups at 12 months (Table 3). Carers in the intervention group had a higher GPAQ enablement score ( $p=0.019$ ; mean difference 24.77, 95% confidence interval 4.15 to 45.40) at 12 months.

## DISCUSSION

### *Principal Findings*

This study examined the effects of a dementia-related educational intervention for GPs. The primary outcome measures related to quality of life and depression scores for patients and carers were not affected by the intervention. There were however, significant findings for several secondary outcome measures, including a significant improvement in the identification of patients with dementia by GPs in the intervention compared with the waitlist group. The higher sensitivity of GP clinical judgement of dementia in the intervention group was not at a significant cost to specificity, which remained similar in the two groups. Satisfaction with GP communication was higher at follow-up in the intervention group compared with the waitlist group for all patients, and specifically for those with dementia. Carer satisfaction with GP communication was not significantly different between the groups at 12 months, however carers of people with dementia in the intervention group reported higher enablement (that is, better ability to understand and cope with their situation). We found no difference in GP management of dementia between intervention and control groups, based on the number of tests and referrals to specialists or care services. It may be that the intervention had a stronger emphasis on identification of dementia than on these aspects of management, due to the time spent addressing attitudinal barriers to dementia identification.

### *Comparison with Other Studies*

Considering how little is known about the trajectory of quality of life across the stages of dementia or its responsiveness to change [49]; it was an optimistic choice of primary outcome measure for a GP based educational intervention. Quality of life is a complex multi-dimensional construct, with no strong common or unique predictors identified across the stages of dementia (reviewed by [50]). The other primary outcome measure for this study, patient depression score, is consistently but moderately associated with decreased quality of life in dementia, especially in the early stage [50] but also difficult to address in people with dementia, with both psychological and pharmacological approaches to treatment having mixed and marginal effects

1  
2  
3 (reviewed by [51]). Although improvement in patient related outcomes such as quality of life  
4 and depression scores may be the ultimate goal, and are certainly important outcome measures,  
5 their responsiveness to changes in GP in diagnosis and management may be slow, and  
6 dependent on the effectiveness of downstream support services. Most other GP-based  
7 interventions for dementia have used behaviour, performance and practice of the health  
8 professional as the primary study outcomes [30-34].  
9  
10  
11  
12  
13

14  
15 The improvement of dementia detection compared with waitlist by GPs following our practice-  
16 based educational intervention is consistent with previous studies using a small group  
17 workshop, decision support software or an interactive seminar approach [32, 33]. The GPCOG  
18 proved to be an effective element of the intervention [52]. Adherence to management guidelines  
19 was not improved by any of these interventions, but was improved in a study that combined the  
20 educational intervention with appointment of dementia care managers [53]. Despite the lack of  
21 change in adherence to management guidelines in our study, in terms of test ordering and  
22 referrals, the improvement in satisfaction with GP communication and/or enablement in  
23 patients and carers in the intervention compared to the waitlist, suggest some other changes in  
24 GP management of dementia patients, not measured here. An external audit process conducted  
25 by independent clinical research staff may be more effective at capturing dementia-related  
26 management during GP clinical encounters, than the GP self-report by audit process used in this  
27 study.  
28  
29  
30  
31  
32  
33  
34  
35  
36  
37  
38  
39  
40  
41

42 Satisfaction with GP communication encompasses a number of factors (including provision of  
43 adequate time, exploring patients' needs, listening, explaining, giving information and sharing  
44 decisions) and is a strong predictor of overall satisfaction with primary care [54]. Effective GP-  
45 patient communication can potentially have a significant impact on patients' quality of life; it is  
46 positively associated with psychological quality of life in people with dementia and with  
47 physical, psychological, social and environmental quality of life in elderly patients without  
48 dementia [9]. Despite the higher satisfaction with GP communication found in this study, there  
49  
50  
51  
52  
53  
54  
55  
56  
57  
58  
59  
60

1  
2  
3 was no concomitant difference in quality of life measures for patients or carers at 12 months as a  
4 result of the intervention. Importantly though, the improvement in the rate of dementia  
5 identification in the intervention group compared to the waitlist, did not result in a decline in  
6  
7 any of the quality of life domains, a concern expressed previously by both carers and GPs [55-  
8  
9  
10  
11 57].

12  
13 The improvement in enablement scores for carers of people with dementia in the intervention,  
14 compared to the waitlist group, at 12 months indicates carers' increased capacity and confidence  
15 with respect to treatment and self-management. Since enablement is related more to the  
16 communication and empathy characteristics of the GP, than to the fulfilment of patient or carer  
17 expectation regarding service outcomes [54, 58] there may have been some change in the GP  
18 management of dementia patients that was not captured by monitoring rates of tests and  
19 referrals. Unfortunately the improvement in enablement scores was not accompanied by any  
20 difference in quality of life scores for carers. This is consistent with the literature; there is little  
21 evidence that support-based interventions for caregivers of people with dementia are effective  
22 [59-62].  
23  
24  
25  
26  
27  
28  
29  
30  
31  
32  
33

### 34 *Strengths and Limitations*

35  
36 This study is strengthened by the use of individual and contemporaneous home assessment of  
37 each participant, meaning that the project assessed current dementia status using a  
38 standardised instrument (CAMCOG-R) rather than relying on administrative data such as GP  
39 records, commonly used in GP research. The educational intervention used activities that had  
40 proved effective in previous research; was specifically designed to address a number of  
41 identified barriers to GP identification and management of dementia; and was personalised to  
42 each GP. An additional strength is that the effect of the intervention was assessed not only on  
43 detection and management of dementia, but also on patient and carer outcomes, thus capturing  
44 the last (and essential) translational output from the intervention.  
45  
46  
47  
48  
49  
50  
51  
52  
53  
54  
55  
56  
57  
58  
59  
60

1  
2  
3 While retention of GPs in the study was excellent, a limitation was the 6% higher than expected  
4 drop-out rate for patients, and the relatively high (and differential) loss to follow-up of carers.

5  
6 The results must, therefore, be interpreted with caution. The observed improvement in GP  
7 identification of dementia in the intervention group compared with waitlist did not lead to  
8 differences in management in terms of referrals to medical specialists or care services. Since GP  
9 learning was not directly measured, and the adherence to dementia guidelines was assessed by  
10 self-reporting of dementia related tests and care and specialist referrals by GPs, it is possible  
11 that some may have improved their practice but did not record it. [63]  
12  
13  
14  
15  
16  
17  
18

19 The relatively short follow up period for this study is also a limitation. An educational  
20 intervention combined with structured care management resulted in a reduction in the decline  
21 of health-related quality of life for dementia patients after 18 months, but not 12 months [53]  
22 suggesting that improvements to quality of life measures may manifest slowly.  
23  
24  
25  
26  
27

### 28 *Implications for Clinicians and Policymakers*

29 This trial illustrates that a simple academic detailing intervention, though more expensive than  
30 large group teaching, can produce significant improvements in GP dementia identification, and  
31 that these can translate into improved communication with consumers and enablement for  
32 carers of people with dementia. Given the huge impact that dementia will have on health  
33 services in the future, and the benefits to both the individual and the health system from timely  
34 diagnosis and carer enablement, this is an important finding for both clinicians and policy  
35 makers.  
36  
37  
38  
39  
40  
41  
42  
43  
44

### 45 *Future Research & Conclusion*

46 This trial raises a number of questions for future research. One concerns the best way to  
47 improve GP management of dementia according to guidelines. Dementia management is  
48 complex and ranges from diagnostic assessment through to a primary care team approach to  
49 those living with dementia in the community, and on to management in residential aged care.  
50 Further research on how best to do this, and also how best to teach it, is urgently needed.  
51  
52  
53  
54  
55  
56  
57  
58  
59  
60

1  
2  
3 Another question concerns the long term effects of better identification of dementia; further  
4 longitudinal studies in primary care are needed for this. Funders should consider longitudinal  
5 studies of dementia in primary care which capture the experience of consumers and carers from  
6 prior to diagnosis, as in this study, and throughout their journey to explore the complex  
7 interactions between personal, health system and broader community factors on the dementia  
8 pathway.  
9  
10  
11  
12  
13  
14  
15  
16  
17  
18  
19  
20  
21  
22  
23  
24  
25  
26  
27  
28  
29  
30  
31  
32  
33  
34  
35  
36  
37  
38  
39  
40  
41  
42  
43  
44  
45  
46  
47  
48  
49  
50  
51  
52  
53  
54  
55  
56  
57  
58  
59  
60

1  
2  
3 **Acknowledgements:** The authors acknowledge the invaluable contributions of Professor  
4 Charles Bridges-Webb, the patient, the public and professional advisors for the study, and the  
5 GP, patient and carer participants that made this study possible.  
6  
7

8 **Funding:** This project was funded by the Australian National Health and Medical Research  
9 Council (Grant ID #351220 and #510745), Beyond Blue: The National Depression Initiative, and  
10 the Australian Government Department of Health and Ageing (Project # ITA195/0506). The  
11 funding body did not have a role in the study design, the collection, analysis, and interpretation  
12 of data or the writing of the article and the decision to submit it for publication. The authors  
13 analysed results and prepared this manuscript independently of the funding body.  
14  
15  
16  
17  
18  
19

20 **Competing interests:** All authors have completed the ICMJE uniform disclosure form at  
21 [www.icmje.org/coi\\_disclosure.pdf](http://www.icmje.org/coi_disclosure.pdf) (available on request from the corresponding author) and  
22 declare that (1) DP and HB have sat on advisory boards for Pfizer, Novartis, Janssen, Lundbeck  
23 and Nutricia, and been speakers sponsored by Pfizer, Novartis (HB only) and Janssen (HB only).  
24 HB has been an investigator on projects funded by Pfizer, Novartis, Janssen, Lundbeck, Lilly and  
25 Sanofi, and acted as a consultant for Merck and Baxter; (2) All other authors have no competing  
26 interests to declare.  
27  
28  
29  
30  
31  
32  
33  
34

35 **Details of contributors:** All authors had full access to data (including statistical reports and  
36 tables) and take responsibility for the integrity of the data and accuracy of the data analysis. CDP  
37 conceived and developed this study, drafted the manuscript, had overall management of the  
38 project and is guarantor. KM assisted in study design, data management and statistical analysis,  
39 and drafted the manuscript. NS assisted in study design, and managed operations at the Adelaide  
40 site. JG assisted in study design, and managed operations at the Melbourne site. JM assisted in  
41 study design. PD assisted in study design, and managed operations at the Bendigo site. PM  
42 assisted in study design and drafted the manuscript. NP developed the educational intervention,  
43 assisted in study design. GH developed the educational intervention, assisted in study design. SG  
44 assisted in study design, provided project management and drafted the manuscript. NW  
45  
46  
47  
48  
49  
50  
51  
52  
53  
54  
55  
56  
57  
58  
59  
60



1  
2  
3 performed the statistical analyses. HB assisted in study design and managed operations at the  
4  
5 Sydney site. All authors read and approved the final manuscript.

6  
7 **Ethical approval:** Ethics approval was sought and granted initially from the Newcastle  
8  
9 University Human Research Ethics Committee (Approval No. H-151-1205), and following this,  
10  
11 from the appropriate Ethics Committees at each site. All participants gave  
12  
13 written informed consent.

14  
15 **Data sharing:** no additional data available.  
16  
17  
18  
19  
20  
21  
22  
23  
24  
25  
26  
27  
28  
29  
30  
31  
32  
33  
34  
35  
36  
37  
38  
39  
40  
41  
42  
43  
44  
45  
46  
47  
48  
49  
50  
51  
52  
53  
54  
55  
56  
57  
58  
59  
60

## REFERENCES

1. Prince M, Wimo A, Guerchet M, Ali G, Wu YT, and Prina M. *World Alzheimer Report 2015 - The Global Impact of Dementia: An analysis of prevalence, incidence, cost and trends*. London: Alzheimer's Disease International, 2015. 84 p.
2. Prince M, Comas-Herrera A, Knapp M, Guerchet M, and Karagiannidou M, *World Alzheimer report 2016 - Improving Healthcare for People Living With Dementia: coverage, quality and costs now and in the future*. London: Alzheimer's Disease International, 2016. 131 p.
3. Integrated care for older people: guidelines on community-level interventions to manage declines in intrinsic capacity. Geneva: World Health Organization; 2017. 46 p.
4. Meeuwse EJ, Melis RJ, Van Der Aa GC, Goluke-Willems GA, De Leest BJ, Van Raak FH, Scholzel-Dorenbos CJ, Verheijen DC, Verhey FR, Visser MC, Wolfs CA, Adang EM, and Olde Rikkert MG. Effectiveness of dementia follow-up care by memory clinics or general practitioners: randomised controlled trial. *BMJ*, 2012. 344: e3086.
5. Pinner G and Bouman WP. Attitudes of patients with mild dementia and their carers towards disclosure of the diagnosis. *International Psychogeriatrics*, 2003. 15(3): 279-88.
6. Jha A, Tabet N, and Orrell M. To tell or not to tell-comparison of older patients' reaction to their diagnosis of dementia and depression. *Int J Geriatr Psychiatry*, 2001. 16(9): 879-85.
7. Byszewski AM, Molnar FJ, Aminzadeh F, Eisner M, Gardezi F, and Bassett R. Dementia diagnosis disclosure: a study of patient and caregiver perspectives. *Alzheimer Dis Assoc Disord*, 2007. 21(2): 107-14.
8. Livingston G, Sommerlad A, Orgeta V, Costafreda SG, Huntley J, Ames D, Ballard C, Banerjee S, Burns A, Cohen-Mansfield J, Cooper C, Fox N, Gitlin LN, Howard R, Kales HC, Larson EB, Ritchie K, Rockwood K, Sampson EL, Samus Q, Schneider LS, Selbaek G, Teri L, and Mukadam N. Dementia prevention, intervention, and care. *Lancet*, 2017. 390(10113):2673-2734.
9. Mate KE, Pond CD, Magin PJ, Goode SM, Mcelduff P, and Stocks NP. Diagnosis and disclosure of a memory problem is associated with quality of life in community based older Australians with dementia. *International Psychogeriatrics*, 2012. 24(12): 1962-71.
10. Hurt CS, Banerjee S, Tunnard C, Whitehead DL, Tsolaki M, Mecocci P, Kloszewska I, Soininen H, Vellas B, and Lovestone S. Insight, cognition and quality of life in Alzheimer's disease. *J Neurol Neurosurg Psychiatry*, 2010. 81(3): 331-6.
11. Bamford C, Lamont S, Eccles M, Robinson L, May C, and Bond J. Disclosing a diagnosis of dementia: a systematic review. *International Journal of Geriatric Psychiatry*, 2004. 19(2): 151-69.
12. Phillips J., Pond D., and Shell A. No time like the present: the importance of a timely dementia diagnosis. Sydney: Alzheimer's Australia, 2010. 31 p.
13. Valcour VG, Masaki KH, Curb JD, and Blanchette PL. The detection of dementia in the primary care setting. *Archives of Internal Medicine*, 2000. 160(19): 2964-8.
14. Pentzek M, Wollny A, Wiese B, Jessen F, Haller F, Maier W, Riedel-Heller SG, Angermeyer MC, Bickel H, Mosch E, Weyerer S, Werle J, Bachmann C, Zimmermann T, Van Den Bussche H, Abholz HH, Fuchs A, and Agecode Study G. Apart from nihilism and stigma: what influences general practitioners' accuracy in identifying incident dementia? *American Journal of Geriatric Psychiatry*, 2009. 17(11): 965-75.
15. Pond CD, Mate KE, Phillips J, Stocks NP, Magin PJ, Weaver N, and Brodaty H. Predictors of agreement between general practitioner detection of dementia and the revised Cambridge Cognitive Assessment (CAMCOG-R). *International Psychogeriatrics*, 2013. 25(10): 1639-47.
16. Wilcock J, Iliffe S, Turner S, Bryans M, O'carroll R, Keady J, Levin E, and Downs M. Concordance with clinical practice guidelines for dementia in general practice. *Aging & Mental Health*, 2009. 13(2): 155-61.
17. Phillips J, Pond D, and Goode S. Timely diagnosis of dementia: Can we do better. Sydney: Alzheimer's Australia, 2011. 43 p.

18. Koch T and Iliffe S. Dementia diagnosis and management: a narrative review of changing practice. *British Journal of General Practice*, 2011. 61(589): 513-25.
19. Cahill S, Clark M, Walsh C, O'connell H, and Lawlor B. Dementia in primary care: the first survey of Irish general practitioners. *International Journal of Geriatric Psychiatry*, 2006. 21(4): 319-24.
20. Van Hout HPJ, Vernooij-Dassen MJ, and Stalman WAB. Diagnosing dementia with confidence by GPs. *Family Practice*, 2007. 24(6): 616-21.
21. Boise L, Camicioli R, Morgan DL, Rose JH, and Congleton L. Diagnosing dementia: perspectives of primary care physicians. *Gerontologist*, 1999. 39(4): 457-64.
22. Phillipson L, Magee C, Jones S and Skladzien E. Exploring dementia and stigma beliefs. A pilot study of Australian adults aged 40 to 65 yrs. Sydney: Alzheimer's Australia, 2012. 15 p.
23. Turner S, Iliffe S, Downs M, Wilcock J, Bryans M, Levin E, Keady J, and O'Carroll R. General practitioners' knowledge, confidence and attitudes in the diagnosis and management of dementia. *Age & Ageing*, 2004. 33(5): 461-7.
24. Turner S IS, Downs M, Bryans M, Wilcock J, Austin T. Decision support software for dementia diagnosis and management in primary care:relevance and potential. *Aging & Mental Health*, 2003. 7(1): 28-33.
25. Koch T and Iliffe S. Rapid appraisal of barriers to the diagnosis and management of patients with dementia in primary care: a systematic review. *BMC Family Practice*, 2010. 11(52).
26. Iliffe S and Wilcock J. The identification of barriers to the recognition of, and response to, dementia in primary care using a modified focus group approach. *Dementia*, 2005. 4(1): 73-85.
27. Kaduszkiewicz H, Wiese B, and Van Den Bussche H. Self-reported competence, attitude and approach of physicians towards patients with dementia in ambulatory care: results of a postal survey. *BMC Health Services Research*, 2008. 8: 54.
28. Koch T and Iliffe S. Dementia diagnosis and management: a narrative review of changing practice. *British Journal of General Practice*, 2011. 61(589): 513-25.
29. Livingston G, Baio G, Sommerlad A, De Lusignan S, Poulimenos S, Morris S, Rait G, and Hoe J. Effectiveness of an intervention to facilitate prompt referral to memory clinics in the United Kingdom: Cluster randomised controlled trial. *PLoS Med*, 2017. 14(3): e1002252.
30. Perry M, Draskovic I, Lucassen P, Vernooij-Dassen M, Van Achterberg T, and Rikkert MO. Effects of educational interventions on primary dementia care: A systematic review. *International Journal of Geriatric Psychiatry*, 2011. 26(1): 1-11.
31. Mukadam N, Cooper C, Kherani N, and Livingston G. A systematic review of interventions to detect dementia or cognitive impairment. *International Journal of Geriatric Psychiatry*, 2015. 30(1): 32-45.
32. Downs M, Turner S, Bryans M, Wilcock J, Keady J, Levin E, O'Carroll R, Howie K, and Iliffe S. Effectiveness of educational interventions in improving detection and management of dementia in primary care: cluster randomised controlled study. *BMJ*, 2006. 332(7543): 692-6.
33. Rondeau V, Allain H, Bakchine S, Bonet P, Brudon F, Chauplannaz G, Dubois B, Gallarda T, Lepine J-P, Pasquier F, Pouchain D, Ritchie K, Robert P, Touchon J, Vellas B, Vercelletto M, Verny M, Carcaillon L, Duveau F, Millet V, Tonelli I, Schuck S, and Dartigues J. General practice-based intervention for suspecting and detecting dementia in France: A cluster randomized controlled trial. *Dementia*, 2008. 7(4): 433-450.
34. Wilcock J, Iliffe S, Griffin M, Jain P, Thuné-Boyle I, Lefford F, and Rapp D. Tailored educational intervention for primary care to improve the management of dementia: The EVIDEM-ED cluster randomised controlled trial. *Trials*, 2013. 14: 397.
35. Avorn J, Academic Detailing: "Marketing" the best evidence to clinicians. *JAMA*, 2017. 317(4): p. 361-362.
36. Lawson G, Basch CH, Zybert P, Wolf RL, and Basch CE. Acceptability of physician directed academic detailing to increase colorectal cancer screening: An application of the RESPECT approach. *Health Promot Perspect*, 2015. 5(3): 169-75.

37. Figueiras A, Sastre I, and Gestal-Otero JJ. Effectiveness of educational interventions on the improvement of drug prescription in primary care: a critical literature review. *Journal of Evaluation in Clinical Practice*, 2001. 7(2): 223-41.
38. Bridges-Webb C and Wolk J. Care of patients with dementia in general practice guidelines. Sydney: The Royal Australian College of General Practitioners and NSW Health, 2003.
39. Pond C, Brodaty H, Stocks N, Gunn J, Marley J, Disler P, Magin P, Paterson N, Horton G, Goode S, Paine B, and Mate K. Ageing in general practice (AGP) trial: a cluster randomised trial to examine the effectiveness of peer education on GP diagnostic assessment and management of dementia. *BMC Family Practice*, 2012. 13(1): 12.
40. Britt H, Miller GC, Charles J, Henderson J, Bayram C, Pan Y, Valenti L, Harrison C, O'Halloran J, and Fahrudin S. General practice activity in Australia 2009–10. General practice series no. 27. Cat. no. GEP 27. Canberra: Australian Institute of Health and Welfare, 2010. 199 p.
41. Roth M, Huppert FA, Mountjoy CQ, and Tym E. *CAMDEX-R: The Cambridge examination for mental disorders of the elderly - revised*. Cambridge: Cambridge University Press; 1998. 108 p.
42. Brodaty H, Kemp NM, and Low LF. Characteristics of the GPCOG, a screening tool for cognitive impairment. *International Journal of Geriatric Psychiatry*, 2004. 19(9): 870-874.
43. Australian Bureau of Statistics. *Census of population and housing: socio-economic indexes for areas (SEIFA), Australia (ABS Cat. No. 2033.0.55.001)*. Canberra: ABS, 2006.
44. World Health Organization. Division of Mental Health and Prevention of Substance Abuse. WHOQOL : measuring quality of life. Geneva : World Health Organization, 1997. 10 p.
45. Sheikh JI and Yesavage JA. Geriatric Depression Scale (GDS): Recent evidence and development of a shorter version. In Brink TL, editor *Clinical Gerontology: A Guide to Assessment*. New York: Haworth Press, 1986. p. 165-73.
46. Huppert FA, Jorm AF, Brayne C, Girling DM, Barkley C, Beardsall L, and Paykel ES. Psychometric properties of the CAMCOG and its efficacy in the diagnosis of dementia. *Aging, Neuropsychology and Cognition*, 1996. 3: 201-214.
47. Beck AT, Ward CH, Mendelson M, Mock J, and Erbaugh J. An inventory for measuring depression. *Arch Gen Psychiatry*, 1961. 4: 561-71.
48. Mead N, Bower P, and Roland M. The General Practice Assessment Questionnaire (GPAQ) - development and psychometric characteristics. *BMC Family Practice*, 2008. 9: 13.
49. Banerjee S, Samsi K, Petrie CD, Alvir J, Treglia M, Schwam EM, and Del Valle M. What do we know about quality of life in dementia? A review of the emerging evidence on the predictive and explanatory value of disease specific measures of health related quality of life in people with dementia. *International Journal of Geriatric Psychiatry*, 2009. 24(1): 15-24.
50. Jing W, Willis R, and Feng Z. Factors influencing quality of life of elderly people with dementia and care implications: A systematic review. *Archives of Gerontology and Geriatrics*, 2016. 66: 23-41.
51. Ford AH and Almeida OP. Management of depression in patients with dementia: Is pharmacological treatment justified? *Drugs Aging*, 2017. 34(2): 89-95.
52. Brodaty H, Connors MH, Loy C, Teixeira-Pinto A, Stocks N, Gunn J, Mate KE, and Pond CD. Screening for Dementia in Primary Care: A Comparison of the GPCOG and the MMSE. *Dementia and Geriatric Cognitive Disorders*, 2016. 42(5-6): 323-330.
53. Vickrey BG, Mittman BS, Connor KI, Pearson ML, Della Penna RD, Ganiats TG, Demonte RW Jr, Chodosh J, Cui X, Vassar S, Duan N, and Lee M. The effect of a disease management intervention on quality and outcomes of dementia care: a randomized, controlled trial. *Annals of Internal Medicine*, 2006. 145(10): 713-26.
54. Paddison CA, Abel GA, Roland MO, Elliott MN, Lyratzopoulos G, and Campbell JL. Drivers of overall satisfaction with primary care: evidence from the English General Practice Patient Survey. *Health Expectations*, 2013. 18(5): 1081-92.
55. Phillips J, Pond CD, Paterson NE, Howell C, Shell A, Stocks NP, Goode SM, and Marley JE. Difficulties in disclosing the diagnosis of dementia: a qualitative study in general practice. *British Journal of General Practice*, 2012. 62(601): 546-53.

- 1  
2  
3  
4  
5  
6  
7  
8  
9  
10  
11  
12  
13  
14  
15  
16  
17  
18  
19  
20  
21  
22  
23  
24  
25  
26  
27  
28  
29  
30  
31  
32  
33  
34  
35  
36  
37  
38  
39  
40  
41  
42  
43  
44  
45  
46  
47  
48  
49  
50  
51  
52  
53  
54  
55  
56  
57  
58  
59  
60
56. Maguire CP, Kirby M, Coen R, Coakley D, Lawlor BA, and O'Neill D, Family members' attitudes toward telling the patient with Alzheimer's disease their diagnosis. *BMJ*, 1996. 313(7056): 529-30.
  57. Holroyd S, Turnbull Q, and Wolf A. What are patients and their families told about the diagnosis of dementia? Results of a family survey. *International Journal of Geriatric Psychiatry*, 2002. 17: 218-221.
  58. Mercer SW, Jani BD, Maxwell M, Wong SY, and Watt GC. Patient enablement requires physician empathy: a cross-sectional study of general practice consultations in areas of high and low socioeconomic deprivation in Scotland. *BMC Family Practice*, 2012. 13: 6.
  59. Argimon JM, Limon E, Vila J, and Cabezas C. Health-related quality of life in carers of patients with dementia. *Family Practice*, 2004. 21(4): 454-7.
  60. Zhang S, Edwards H, Yates P, Li C, and Guo Q. Self-efficacy partially mediates between social support and health-related quality of life in family caregivers for dementia patients in Shanghai. *Dement Geriatr Cogn Disord*, 2013. 37(1-2): 34-44.
  61. Thompson CA, Spilsbury K, Hall J, Birks Y, Barnes C, and Adamson J. Systematic review of information and support interventions for caregivers of people with dementia. *BMC Geriatrics*, 2007. 7: 18.
  62. Livingston G, Barber J, Rapaport P, Knapp M, Griffin M, King D, Livingston D, Mummery C, Walker Z, Hoe J, Sampson EL, and Cooper C. Clinical effectiveness of a manual based coping strategy programme (START, STRategies for RelaTives) in promoting the mental health of carers of family members with dementia: pragmatic randomised controlled trial. *BMJ*, 2013. 347: 6276.
  63. Mercer SW and Watt GC, The inverse care law: clinical primary care encounters in deprived and affluent areas of Scotland. *Annals of Family Medicine*, 2007. 5(6): 503-10.

Table 1 | Characteristics of GPs, patients and carers in the Waitlist and Intervention groups at baseline.

|                                             | Class or mean (SD) | Waitlist       | Intervention    |
|---------------------------------------------|--------------------|----------------|-----------------|
| <b>Patient characteristics</b>              |                    | <b>(n=552)</b> | <b>(n=1478)</b> |
| Gender <sup>a</sup>                         | Male               | 259 (47%)      | 671 (45%)       |
|                                             | Female             | 293 (53%)      | 805 (55%)       |
| Age (years)                                 | Mean (SD)          | 81.2 (4.4)     | 81.3 (4.2)      |
| IRSAD <sup>b</sup>                          | Mean (SD)          | 6.7 (2.5)      | 7.1 (2.5)       |
| CAMCOG score                                | Mean (SD)          | 90.6 (7.8)     | 90.0 (8.2)      |
| CAMCOG diagnosis                            | Impaired           | 43 (7.8%)      | 124 (8.4%)      |
|                                             | Not Impaired       | 505 (92%)      | 1352 (92%)      |
| <b>Carer characteristics</b>                |                    | <b>(n=21)</b>  | <b>(n=90)</b>   |
| Gender                                      | Male               | 6 (29%)        | 25 (28%)        |
|                                             | Female             | 15 (71%)       | 65 (72%)        |
| Age (years)                                 | Mean (SD)          | 70.3 (12.8)    | 73.0 (16.3)     |
| IRSAD                                       | Mean (SD)          | 6.9 (2.2)      | 6.5 (2.5)       |
| <b>General Practitioner characteristics</b> |                    | <b>(n=55)</b>  | <b>(n=113)</b>  |
| Gender <sup>a</sup>                         | Male               | 28 (58%)       | 63 (58%)        |
|                                             | Female             | 20 (42%)       | 46 (42%)        |
| Age (years)                                 | Mean (SD)          | 51.5 (9.9)     | 50.4 (8.5)      |
| Practice Size                               | Solo               | 10 (22%)       | 17 (16%)        |
|                                             | 2-4 GPs            | 12 (27%)       | 38 (36%)        |
|                                             | More than 5 GPs    | 23 (51%)       | 52 (49%)        |
| Number of patients in study                 | Mean (SD)          | 10.0 (6.6)     | 13.1 (11.6)     |

<sup>a</sup> Gender was not disclosed by all patient or GP participants

<sup>b</sup> Index of Relative Social Advantage and Disadvantage



Table 2| Baseline outcome measures of patients, dementia patients and their carers in the Waitlist and Intervention groups.

|                                                       | Waitlist<br>Mean (SD) | Intervention<br>Mean (SD) |
|-------------------------------------------------------|-----------------------|---------------------------|
| <b>Patient measures</b>                               | <b>(n=552)</b>        | <b>(n=1478)</b>           |
| Geriatric Depression Scale (GDS)                      | 1.9 (1.9)             | 2.1 (2.1)                 |
| WHOQoL – BREF:                                        |                       |                           |
| Physical                                              | 70.4 (15.3)           | 69.5 (15.0)               |
| Psychological                                         | 72.1 (12.9)           | 70.8 (12.6)               |
| Social                                                | 79.7 (13.6)           | 78.8 (13.2)               |
| Environmental                                         | 81.4 (10.8)           | 80.6 (11.4)               |
| GPAQ:                                                 |                       |                           |
| Communication                                         | 81.4 (15.5)           | 80.5 (14.4)               |
| Enablement                                            | 67.7 (31.8)           | 66.0 (32.1)               |
| <b>GP management of dementia patients<sup>a</sup></b> | <b>(n=63)</b>         | <b>(n=192)</b>            |
| Number of tests per patient (0–3)                     | 0.79                  | 1.13                      |
| Number of referrals per patient (0–2)                 | 0.24                  | 0.31                      |
| <b>Dementia patient measures<sup>b</sup></b>          | <b>(n=43)</b>         | <b>(n=124)</b>            |
| Accessed Memory Services (% yes)                      | 6 (14%)               | 13 (12%)                  |
| Geriatric Depression Scale (GDS)                      | 3.5 (3.2)             | 3.3 (2.8)                 |
| WHOQoL – BREF:                                        |                       |                           |
| Physical                                              | 66.45 (15.94)         | 63.80 (14.98)             |
| Psychological                                         | 67.44 (13.71)         | 64.80 (12.56)             |
| Social                                                | 73.58 (12.90)         | 76.65 (12.69)             |
| Environmental                                         | 76.04 (10.57)         | 74.60 (14.01)             |
| GPAQ:                                                 |                       |                           |
| Communication                                         | 74.4 (14.2)           | 75.8 (15.1)               |
| Enablement                                            | 57.0 (33.7)           | 60.2 (34.6)               |
| <b>Carer measures</b>                                 | <b>(n=21)</b>         | <b>(n=90)</b>             |
| Beck Depression Inventory (BDI)                       | 10.3 (8.6)            | 8.5 (6.3)                 |
| WHOQoL – BREF:                                        |                       |                           |
| Physical                                              | 69.6 (16.7)           | 70.2 (13.8)               |
| Psychological                                         | 68.4 (14.4)           | 69.0 (10.9)               |
| Social                                                | 76.0 (19.2)           | 77.1 (12.2)               |
| Environmental                                         | 77.5 (12.5)           | 77.2 (11.6)               |
| GPAQ:                                                 |                       |                           |
| Communication                                         | 67.9 (21.1)           | 78.4 (16.8)               |
| Enablement                                            | 50.0 (35.8)           | 61.2 (36.4)               |

<sup>a</sup> participants with GP audit of possible, probable or definite dementia

<sup>b</sup> participants with CAMCOG < 80

Table 3| Twelve month outcome measures of patients, dementia patients and their carers in the Waitlist and Intervention groups

|                                                       |                    |                        | Intervention vs. Waitlist                                                           | Adjusted p-value (GEE) |
|-------------------------------------------------------|--------------------|------------------------|-------------------------------------------------------------------------------------|------------------------|
|                                                       | Waitlist Mean (SD) | Intervention Mean (SD) | Difference at 12 months adjusted for baseline and site Mean (95% CI) or OR (95% CI) |                        |
| <b>Patient measures</b>                               | <b>(n=416*)</b>    | <b>(n=1188*)</b>       |                                                                                     |                        |
| Geriatric Depression Scale (GDS)                      | 2.1 (2.2)          | 2.1 (2.0)              | -0.04 (-0.22 to 0.14)                                                               | 0.6832                 |
| WHOQoL – BREF:                                        |                    |                        |                                                                                     |                        |
| Physical                                              | 68.7 (15.6)        | 68.8 (14.9)            | 0.45 (-0.83 to 1.73)                                                                | 0.4880                 |
| Psychological                                         | 71.5 (12.9)        | 71.0 (12.3)            | 0.67 (-0.65 to 2)                                                                   | 0.3183                 |
| Social                                                | 77.7 (12.9)        | 77.1 (12.2)            | -0.04 (-1.5 to 1.42)                                                                | 0.9593                 |
| Environmental                                         | 81.1 (10.8)        | 79.9 (11.6)            | -0.35 (-1.77 to 1.07)                                                               | 0.6272                 |
| GPAQ:                                                 |                    |                        |                                                                                     |                        |
| Communication                                         | 78.3 (16.4)        | 79.7 (15.0)            | 2.1 (0.27 to 3.93)                                                                  | 0.0242                 |
| Enablement                                            | 63.4 (34.9)        | 64.3 (32.5)            | 1.23 (-3.71 to 6.18)                                                                | 0.6248                 |
| <b>GP management of dementia patients<sup>a</sup></b> | <b>(n=44)</b>      | <b>(n=166)</b>         |                                                                                     |                        |
| Number of tests per patient (0–3)                     | 0.64               | 0.55                   | OR: 1.01 (0.52 to 1.97)                                                             | 0.9729                 |
| Number of referrals per patient (0–2)                 | 0.16               | 0.18                   | OR: 1.50 (0.55 to 4.10)                                                             | 0.4285                 |
| <b>Dementia patient measures<sup>b</sup></b>          | <b>(n=34)</b>      | <b>(n=82)</b>          |                                                                                     |                        |
| Accessed Memory Services (% yes)                      | 3 (11%)            | 9 (13%)                | OR: 2.15 (0.32 to 14.49)                                                            | 0.4333                 |
| Geriatric Depression Scale (GDS)                      | 3.1 (2.9)          | 2.7 (2.0)              | -0.41 (-1.24 to 0.42)                                                               | 0.3335                 |
| WHOQoL – BREF:                                        |                    |                        |                                                                                     |                        |
| Physical                                              | 65.4 (16.0)        | 66.0 (12.6)            | 2.55 (-1.23 to 6.34)                                                                | 0.1864                 |
| Psychological                                         | 66.4 (15.0)        | 65.2 (12.6)            | 2.63 (-0.8 to 6.07)                                                                 | 0.1334                 |
| Social                                                | 73.6 (13.2)        | 75.0 (11.6)            | 0.79 (-3.7 to 5.29)                                                                 | 0.7297                 |
| Environmental                                         | 77.1 (13.6)        | 75.6 (12.2)            | 0.54 (-3.01 to 4.09)                                                                | 0.7660                 |
| GPAQ:                                                 |                    |                        |                                                                                     |                        |
| Communication                                         | 72.6 (18.6)        | 78.6 (15.3)            | 7.44 (2.02 to 12.86)                                                                | 0.0072                 |
| Enablement                                            | 55.8 (36.1)        | 63.9 (33.3)            | 5.65 (-8.68 to 19.98)                                                               | 0.4395                 |
| <b>Carer measures</b>                                 | <b>(n=15)</b>      | <b>(n=55)</b>          |                                                                                     |                        |
| Beck Depression Inventory (BDI)                       | 8.2 (6.2)          | 7.3 (4.4)              | -2.67 (-6.93 to 1.59)                                                               | 0.2195                 |
| WHOQoL – BREF:                                        |                    |                        |                                                                                     |                        |
| Physical                                              | 76.3 (10.4)        | 69.8 (12.3)            | -5.15 (-13.02 to 2.72)                                                              | 0.1995                 |
| Psychological                                         | 71.4 (7.6)         | 69.0 (11.3)            | 1.58 (-2.56 to 5.71)                                                                | 0.4556                 |
| Social                                                | 73.8 (16.0)        | 73.3 (13.5)            | 5.88 (-2.89 to 14.66)                                                               | 0.1889                 |
| Environmental                                         | 81.0 (6.5)         | 77.6 (11.1)            | -1.53 (-5.77 to 2.70)                                                               | 0.4786                 |
| GPAQ:                                                 |                    |                        |                                                                                     |                        |
| Communication                                         | 75.0 (13.2)        | 77.1 (19.0)            | 1.91 (-8.02 to 11.85)                                                               | 0.7060                 |
| Enablement                                            | 42.9 (33.8)        | 64.1 (37.1)            | 24.77 (4.15 to 45.40)                                                               | 0.0185                 |

<sup>a</sup> participants with GP audit of possible, probable or definite dementia at 12 months

<sup>b</sup> participants with CAMCOG < 80 at 12 months



Table 4| Sensitivity and specificity of the GP Audit (compared to CAMCOG-R, a standardized instrument used to measure the extent of dementia) in the Waitlist and Intervention groups at baseline and 12 months

|                          | Baseline            |                          | 12 months           |                          | Intervention vs. Waitlist<br>Difference at 12months <sup>a</sup><br>OR (95% CI) | Adjusted<br>p-value<br>(GEE) |
|--------------------------|---------------------|--------------------------|---------------------|--------------------------|---------------------------------------------------------------------------------|------------------------------|
|                          | Waitlist<br>(n=548) | Intervention<br>(n=1476) | Waitlist<br>(n=415) | Intervention<br>(n=1187) |                                                                                 |                              |
| Sensitivity <sup>b</sup> | 18 (43%)            | 55 (45%)                 | 7 (29%)             | 47 (65%)                 | 6.00 (1.92 to 18.73)                                                            | 0.0020                       |
| Specificity <sup>c</sup> | 429 (91%)           | 1196 (90%)               | 272(88%)            | 844 (88%)                | 0.79 (0.38 to 1.65)                                                             | 0.5298                       |

<sup>a</sup> adjusted for baseline and site

<sup>b</sup> patients with CAMCOG-R score <80 that were judged by GP as having possible, probable or definite dementia

<sup>c</sup> patients with CAMCOG-R score ≥80 that were judged not to have dementia by their GP

## FIGURE LEGEND

**Figure 1** Flow of participants through the study. Baseline patient interviews were conducted May 2007 to November 2009; 12 month interviews were conducted August 2008 to December 2010.

For peer review only

1  
2  
3  
4  
5  
6  
7  
8  
9  
10  
11  
12  
13  
14  
15  
16  
17  
18  
19  
20  
21  
22  
23  
24  
25  
26  
27  
28  
29  
30  
31  
32  
33  
34  
35  
36  
37  
38  
39  
40  
41  
42  
43  
44  
45  
46  
47  
48  
49  
50  
51  
52  
53  
54  
55  
56  
57  
58  
59  
60

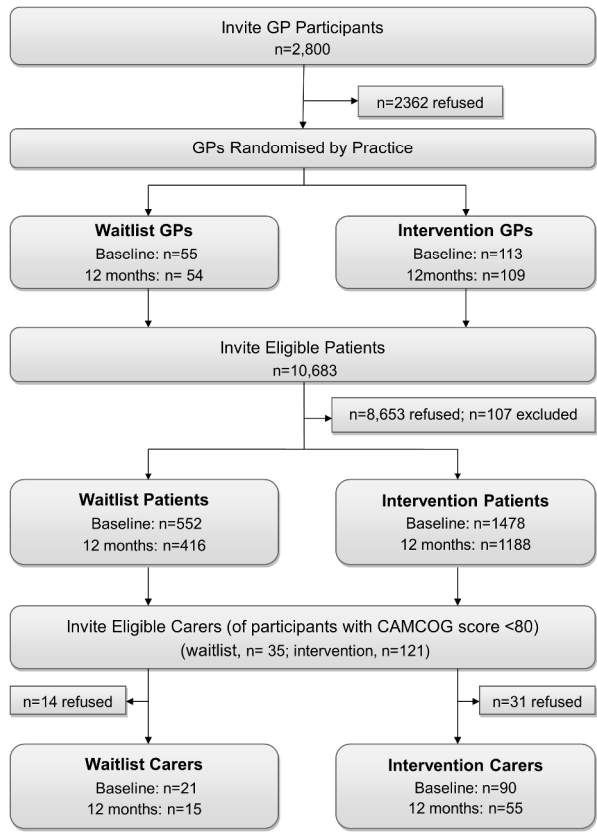

266x355mm (300 x 300 DPI)

## Checklist of Items for Reporting Trials of Nonpharmacologic Treatments\*

| Section                    | Item | Standard CONSORT Description                                                                                                                                                              | Extension for Nonpharmacologic Trials                                                                                                                                       | Reported on Page No.       |
|----------------------------|------|-------------------------------------------------------------------------------------------------------------------------------------------------------------------------------------------|-----------------------------------------------------------------------------------------------------------------------------------------------------------------------------|----------------------------|
| <b>Title and abstract†</b> | 1    | How participants were allocated to interventions (e.g., “random allocation,” “randomized,” or “randomly assigned”)                                                                        | In the abstract, description of the experimental treatment, comparator, care providers, centers, and blinding status                                                        | 2                          |
| <b>Introduction</b>        |      |                                                                                                                                                                                           |                                                                                                                                                                             |                            |
| Background                 | 2    | Scientific background and explanation of rationale                                                                                                                                        |                                                                                                                                                                             | 4-5                        |
| <b>Methods</b>             |      |                                                                                                                                                                                           |                                                                                                                                                                             |                            |
| Participants†              | 3    | Eligibility criteria for participants and the settings and locations where the data were collected                                                                                        | When applicable, eligibility criteria for centers and those performing the interventions                                                                                    | 6                          |
| Interventions†             | 4    | Precise details of the interventions intended for each group and how and when they were actually administered                                                                             | Precise details of both the experimental treatment and comparator                                                                                                           | 7                          |
|                            | 4A   |                                                                                                                                                                                           | Description of the different components of the interventions and, when applicable, descriptions of the procedure for tailoring the interventions to individual participants | 7<br>(and Pond et al 2012) |
|                            | 4B   |                                                                                                                                                                                           | Details of how the interventions were standardized                                                                                                                          | 7                          |
|                            | 4C   |                                                                                                                                                                                           | Details of how adherence of care providers with the protocol was assessed or enhanced                                                                                       | 7-8                        |
| Objectives                 | 5    | Specific objectives and hypotheses                                                                                                                                                        |                                                                                                                                                                             | 5                          |
| Outcomes                   | 6    | Clearly defined primary and secondary outcome measures and, when applicable, any methods used to enhance the quality of measurements (e.g., multiple observations, training of assessors) |                                                                                                                                                                             | 9-10                       |
| Sample size†               | 7    | How sample size was determined and, when applicable, explanation of any interim analyses and stopping rules                                                                               | When applicable, details of whether and how the clustering by care providers or centers was addressed                                                                       | 10                         |

1  
2  
3  
4  
5  
6  
7  
8  
9  
10  
11  
12  
13  
14  
15  
16  
17  
18  
19  
20  
21  
22  
23  
24  
25  
26  
27  
28  
29  
30  
31  
32  
33  
34  
35  
36  
37  
38  
39  
40  
41  
42  
43  
44  
45  
46  
47

|                                        |             |                                                                                                                                                                                                                                                                                                                                        |                                                                                                                                                              |                            |
|----------------------------------------|-------------|----------------------------------------------------------------------------------------------------------------------------------------------------------------------------------------------------------------------------------------------------------------------------------------------------------------------------------------|--------------------------------------------------------------------------------------------------------------------------------------------------------------|----------------------------|
| Randomization–<br>sequence generation† | 8           | Method used to generate the random allocation sequence, including details of any restriction (e.g., blocking, stratification)                                                                                                                                                                                                          | When applicable, how care providers were allocated to each trial group                                                                                       | 6<br>(and Pond et al 2014) |
| Allocation concealment                 | 9           | Method used to implement the random allocation sequence (e.g., numbered containers or central telephone), clarifying whether the sequence was concealed until interventions were assigned                                                                                                                                              |                                                                                                                                                              | 6<br>(and Pond et al 2014) |
| Implementation                         | 10          | Who generated the allocation sequence, who enrolled participants, and who assigned participants to their groups                                                                                                                                                                                                                        |                                                                                                                                                              | 6                          |
| Blinding (masking)†                    | 11A         | Whether or not participants, those administering the interventions, and those assessing the outcomes were blinded to group assignment                                                                                                                                                                                                  | Whether or not those administering co-interventions were blinded to group assignment                                                                         | 7-8                        |
|                                        | 11B         |                                                                                                                                                                                                                                                                                                                                        | If blinded, method of blinding and description of the similarity of interventions†                                                                           | 7-8                        |
| Statistical methods†                   | 12          | Statistical methods used to compare groups for primary outcome(s); methods for additional analyses, such as subgroup analyses and adjusted analyses                                                                                                                                                                                    | When applicable, details of whether and how the clustering by care providers or centers was addressed                                                        | 10                         |
| <b>Results</b>                         |             |                                                                                                                                                                                                                                                                                                                                        |                                                                                                                                                              |                            |
| Participant flow†                      | 13          | Flow of participants through each stage (a diagram is strongly recommended)--- specifically, for each group, report the numbers of participants randomly assigned, receiving intended treatment, completing the study protocol, and analyzed for the primary outcome; describe deviations from study as planned, together with reasons | The number of care providers or centers performing the intervention in each group and the number of patients treated by each care provider or in each center | Fig 1                      |
| Implementation of<br>intervention†     | New<br>item |                                                                                                                                                                                                                                                                                                                                        | Details of the experimental treatment and comparator as they were implemented                                                                                | 11                         |
| Recruitment                            | 14          | Dates defining the periods of recruitment and follow-up                                                                                                                                                                                                                                                                                |                                                                                                                                                              | Fig 1                      |
| Baseline data†                         | 15          | Baseline demographic and clinical characteristics of each group                                                                                                                                                                                                                                                                        | When applicable, a description of care providers (case volume, qualification, expertise, etc.) and centers (volume) in each group                            | 12, Table 1                |

|                         |    |                                                                                                                                                                                                           |                                                                                                                                                                       |                    |
|-------------------------|----|-----------------------------------------------------------------------------------------------------------------------------------------------------------------------------------------------------------|-----------------------------------------------------------------------------------------------------------------------------------------------------------------------|--------------------|
| Numbers analyzed        | 16 | Number of participants (denominator) in each group included in each analysis and whether analysis was by “intention-to-treat”; state the results in absolute numbers when feasible (e.g., 10/20, not 50%) |                                                                                                                                                                       | Tables 1-4         |
| Outcomes and estimation | 17 | For each primary and secondary outcome, a summary of results for each group and the estimated effect size and its precision (e.g., 95% confidence interval)                                               |                                                                                                                                                                       | 12-13 & Tables 1-4 |
| Ancillary analyses      | 18 | Address multiplicity by reporting any other analyses performed, including subgroup analyses and adjusted analyses, indicating those prespecified and those exploratory                                    |                                                                                                                                                                       | NA                 |
| Adverse events          | 19 | All important adverse events or side effects in each intervention group                                                                                                                                   |                                                                                                                                                                       | NA                 |
| <b>Discussion</b>       |    |                                                                                                                                                                                                           |                                                                                                                                                                       |                    |
| Interpretation†         | 20 | Interpretation of the results, taking into account study hypotheses, sources of potential bias or imprecision, and the dangers associated with multiplicity of analyses and outcomes                      | In addition, take into account the choice of the comparator, lack of or partial blinding, and unequal expertise of care providers or centers in each group            | 14                 |
| Generalizability†       | 21 | Generalizability (external validity) of the trial findings                                                                                                                                                | Generalizability (external validity) of the trial findings according to the intervention, comparators, patients, and care providers and centers involved in the trial | 15-16              |
| Overall evidence        | 22 | General interpretation of the results in the context of current evidence                                                                                                                                  |                                                                                                                                                                       | 14-17              |

\*Additions or modifications to the CONSORT checklist. CONSORT = Consolidated Standards of Reporting Trials.

†This item was modified in the 2007 revised version of the CONSORT checklist.
